# Supplementary material for: Evaluation of the diet wide contribution to serum urate levels: meta-analysis of population based cohorts
Source: PubMed Central journal article supplement — BMJ. 2018 Oct 10;363:k3951. doi: 10.1136/bmj.k3951 (PMC6174725; doi:10.1136/bmj.k3951), 2018-10-10
Supplement: majt042924.ww1.pdf [file majt042924.ww1.pdf]

## **SUPPLEMENTAL MATERIAL**

### **An evaluation of the diet-wide contribution to serum urate levels: meta-analysis of population based cohorts**

Tanya J Major<sup>1</sup>, Ruth K Topless<sup>1</sup>, Nicola Dalbeth<sup>2</sup>, Tony R Merriman<sup>1\*</sup>

## SUPPLEMENTAL METHODS

### Diet-Wide Association Study (DWAS)

All statistical analyses were performed using R v3.2.3 ([www.R-project.org](http://www.R-project.org)). For all regression analyses individuals with partial or missing data were excluded. For each food item a multivariable linear regression adjusted for sex, age, body mass index, menopausal status, average daily calorie intake, years of education, exercise levels, and smoking status was conducted in the five cohorts separately. For each regression analysis the partial  $R^2$  ( $R_B^2$ ) attributable to the food item was calculated by comparing the regression  $R^2$  ( $R_{AB}^2$ ) to the  $R^2$  ( $R_A^2$ ) of a corresponding regression using all the adjusting variables, but not the food item using the ‘partial.R2’ function within the R ‘asbio’ package.[1] Analyses in ARIC, CARDIA, CHS, and FHS were additionally adjusted for whole-genome principal component vectors one to four to account for cryptic relatedness (especially within FHS) that may cause inflation of test statistics owing to possible shared diet or heritability of serum urate levels. Principal components were calculated using publicly available whole-genome genotyping data (no genotype data were available for NHANES III) and the EIGENSOFT 2.0 SmartPCA program.[2] Regression beta values from the five cohorts were combined using an inverse-variance weighted meta-analysis with a Q-statistic calculated to detect any inter-cohort heterogeneity using the ‘metagen’ function within the R meta package.[3] A fixed-effect model was used if there was no significant heterogeneity, with a random-effect model used in the presence of heterogeneity ( $P_Q < 0.1$ ). The diet-wide association analysis was repeated with the inclusion of four scores estimating diet quality (each detailed below) as adjusting variables. Diet-wide significance was set at  $P_\beta < 7.94 \times 10^{-4}$  after Bonferroni correction for multiple testing (0.05 divided by 63 food items). For each food item the four basic statistical assumptions of a linear regression (linear relationship, multivariable normality, multi-collinearity, and homoscedasticity) were assessed by generating plots of the food item versus serum urate, the standardised residuals versus the normal distribution (quantile-quantile plot), and the standardised residuals versus the predicted values from the linear regression. These plots (not shown) did not indicate any substantial deviation from these basic statistical assumptions.

### Diet Score Construction

Four diet scores were evaluated. The first was a Healthy Eating diet score calculated based on the Harvard Healthy Eating Pyramid (2008) and Healthy Eating Plate (2011) guidelines and an adaptation of the methodologies used by Nettleton et al.[4] Food frequency questions (in serves per week) were combined into four categories representing the different levels of the Harvard Healthy Eating Pyramid

/Plate [5] – Level 1: red meat, butter, refined grains, potatoes, sugar-sweetened beverages, and desserts or sweets; Level 2: dairy products (excluding butter) and alcohol; Level 3: nuts, seeds, beans, fish, poultry, and eggs; Level 4: vegetables, fruits, and whole grains. Quartiles of these four levels were determined and labelled numerically (0, 1, 2, 3) before being multiplied by a number representing each pyramid level. Level 1 was multiplied by negative two (least favourable), level 2 was multiplied by negative one, level 3 was multiplied by one, and level 4 was multiplied by two (most favourable). These values were summed to create a Healthy Eating score with a minimum value of -9 and a maximum value of 9, with a larger number indicating ‘healthier’ dietary habits (Figure S2).

The second diet score was the ‘Dietary Approaches to Stop Hypertension (DASH)’ score calculated based on the DASH diet recommendations and a direct replication of the methodologies used previously.[6,7] Food items (in serves per week) were grouped into five food groups representing foods that are favourable in the DASH diet; fruits, vegetables, nuts or legumes, whole grains, and low-fat dairy products. Two food groups representing foods that are unfavourable in the DASH diet were also created; red or processed meats and sugar-sweetened beverages. An estimate of the total sodium intake (calculated as part of the food to macro-nutrient conversion protocols performed by each study[8-12]) was included as a final food group that is unfavourable in the DASH diet. Each food group was classified into quintiles. Quintiles for foods that are favourable in the DASH diet was labelled in ascending order (1, 2, 3, 4, 5) and for labelled in descending order for foods that are unfavourable in the DASH diet (5, 4, 3, 2, 1). These component scores were summed together for each of the 8 food groups to create the final DASH diet score with a minimum value of 8 and a maximum value of 40, with a larger number indicating ‘healthier’ dietary habits (Figure S3).

The third diet score was the Mediterranean diet score, constructed as previously described.[13] The index ascertains consumption of nine major food groups (non-refined cereals, potatoes, fruit, vegetables, legumes, fish, red meat, poultry, and full-fat dairy products), along with olive oil and alcohol intake. Olive oil was unable to be included as these data were not collected by all five of the study cohorts. Food items were grouped into the nine food groups, before each food group was split into six categories of consumption (0; >0, ≤ 1; >1, ≤ 2; >2, ≤ 3; >3, ≤ 4; and >4 serves per week). These categories were labelled from 0 to 5 in ascending order (0, 1, 2, 3, 4, 5) for the food groups favoured in the Mediterranean diet (non-refined cereals, potatoes, fruit, vegetables, legumes, and fish) and in descending order (5, 4, 3, 2, 1, 0) for the food groups not favoured in the Mediterranean diet

(red meat, poultry, and full-fat dairy). Alcohol consumption was split into similar consumption categories, however those who reported consuming no alcohol were grouped with those who reported consuming >4 serves per week of alcohol ( $>0, \leq 1$ ;  $>1, \leq 2$ ;  $>2, \leq 3$ ;  $>3, \leq 4$ ; and  $>4$  or 0 serves per week) as the Mediterranean diet considers alcohol intake of greater than 0 and less than 4 servings per week to be favourable. This definition of alcohol consumption categories was the same between males and females. The alcohol categories were labelled from 0 to 4 in descending order (4, 3, 2, 1, 0). The labelled food groups (and alcohol) were summed together to create the Mediterranean diet score, with a minimum value of 0 and a maximum value of 49, with a larger number indicating higher adherence to the Mediterranean diet (Figure S4).

The final diet score was a data-driven measure of the true dietary patterns. To create this score the five cohorts were combined and the 37 food items with complete information in all cohorts were extracted (beer, liquor, wine, citrus juice, non-citrus juice, coffee, tea, diet soft drink, soft drink, butter, cheese, ice cream, skim milk, whole milk, yoghurt, cake or pie, chocolate, biscuits or muffins, fish, shellfish, citrus fruit, non-citrus fruit, brown bread, white bread, cold cereal, pasta, legumes, meat (beef, pork, or lamb), liver, poultry, potato, spinach, tomato, winter squash, margarine, eggs, chips or popcorn). A parallel factor analysis was conducted using these 37 food items to visualise the point of inflection and determine the number of factors to use ( $n=11$ ) by comparing the scree plot from the actual data to simulated and resampled versions of the same data (Figure S5).[14] The 11 retained factors were rotated by an orthogonal transformation (varimax) - factors that had a sum of square loadings  $>1$  were identified ( $n=1$ ) and factor loadings (for each food item)  $>0.2$  were extracted based on the methodologies of [14-17]. This resulted in the construction of a single data-driven diet score based on factor loadings for seven food items (non-citrus juice=0.22, soft drink=0.40, butter=0.34, white bread=0.47, pasta=0.21, meat (beef, pork, or lamb)=0.50, and chips or popcorn=0.30). Consumption of each food item (in serves per week) was multiplied by the corresponding factor loading and these values were summed together. The resultant data-driven diet score had a minimum value of 0 and a maximum value of 71, with a larger number indicating that an individual consumed higher amounts of the seven food items used to construct the score (Figure S6).

The correlation between diet scores was assessed using a Pearson's product-moment correlation test. The diet scores were included in separate multivariable linear regression of serum urate levels adjusted for sex, age, body mass index, menopausal status, average daily calorie intake, years of education,

exercise levels, smoking status, whole-genome principal component vectors one to four for ARIC, CARDIA, CHS, and FHS, and alcohol for the DASH diet score analysis (the DASH diet score does not include a separate component for alcohol). Regression beta values from each cohort were combined using an inverse-variance weighted meta-analysis with a fixed-effect model if there was no significant heterogeneity, and a random-effect model if there was heterogeneity present ( $P_Q < 0.1$ ). A p-value less than 0.05 was considered statistically significant for the diet quality score analyses.

### Genetic analysis

The percentage of variance in serum urate explained by common genetic variants was assessed in two ways. Firstly, the 30 genome-wide significant variants identified in the largest European genome-wide association study[18] were obtained from the whole-genome genotyping data of the ARIC, CARDIA, CHS, and FHS cohorts. All variants were in Hardy-Weinberg equilibrium ( $P > 0.01$ ) within the combined analysis group, except for *rs653178* ( $P_{HWE} < 0.001$ ) and *rs2079742* ( $P_{HWE} = 0.005$ ). For these two SNPs the individual cohorts were in Hardy-Weinberg equilibrium, except *rs653178* for ARIC ( $P_{HWE} = 0.002$ ). A weighted genetic risk score was constructed from these genotypes and assessed for its contribution to serum urate variability. Where a particular variant in the genetic risk score was not directly genotyped, it was imputed using the IMPUTE2 imputation method and the 1000 Genomes phase 3 reference panel [19]. Imputation quality was high for all SNPs analysed (quality score  $\geq 0.71$ ). To create the genetic risk score genotypes were coded (0, 1, 2) to represent the number of urate-raising alleles present, as defined by the effect directions previously reported and were multiplied by the effect size ( $\beta$ -value; converted to  $\mu\text{mol/L}$ ).[18] These weighted variables were summed together, resulting in a genetic risk score with a minimum value of 0 and a maximum value of 236.15. The genetic risk score was tested for association with serum urate levels using a multivariable linear regression, adjusted for sex, age, body mass index, menopausal status, average daily calorie intake, years of education, exercise levels, smoking status, and whole-genome principal component vectors one to four. The resultant regression beta values from each cohort were combined using an inverse-variance weighted meta-analysis.

Secondly, non-imputed whole-genome genotypes for the ARIC, CARDIA, CHS, and FHS cohorts were merged, then filtered to exclude variants deviating from Hardy-Weinberg equilibrium ( $P < 0.001$ ), with a variant call rate ( $< 70\%$ ), or a minor allele frequency  $< 0.01$  using PLINK v1.90,[20] before a genetic relationship matrix was created using GCTA v1.26.0.[21] The genetic heritability of serum

urate was then calculated using the restricted maximum likelihood (REML) analysis procedure within GCTA v1.26.0. This heritability estimate was adjusted for sex, age, body mass index, menopausal status, average daily calorie intake, years of education, exercise levels, smoking status, and whole-genome principal component vectors one to four.

## SUPPLEMENTAL TABLES

### **Table S1. Demographic, anthropomorphic, and clinical summary for the five datasets.**

Values are shown as the mean  $\pm$  standard deviation, or as the number of participants (percentage). For menopause status the percentage is of only the female participants.

### **Table S2. Food frequency questionnaire answer categories and serves per week conversion factor.**

NHANES III did not specify portion size. CHS only specified relative portion size (small, medium, or large). ARIC, CARDIA, and FHS did not specify the same portion sizes. Portion size was not considered in this study. Category – possible answers as designated by the study questionnaire. Conversion – number of serves per week corresponding to the average category answer.

### **Table S3. Summary of 63 comparable food items and their study-specific food frequency questions.**

/ – indicates items were asked about together on the questionnaire. ; – indicates questions that were combined before analysis to make food items comparable between studies. \* – indicates not all data-sets had a comparable question, the number of asterisks represents the number of data-sets missing data.

### **Table S4. Summary of the average consumption frequency for 63 food items after conversion to serves per week.**

All values are presented in serves per week. \* – indicates not all data-sets were included in the analysis, the number of asterisks represents the number of data-sets missing data for this food item. n – number of participants.

### **Table S5. Diet-wide association study results for the original and diet quality score adjusted analyses in the full cohort.**

n – number of participants analysed.  $\beta$  – inverse-variance weighted meta-analysis beta value, reflecting the change in serum urate level ( $\mu\text{mol/L}$ ) per one extra serve per week of the food item. 95% CI – 95% confidence intervals of the beta value.  $P_\beta$  – p-value for meta-analysis beta value, p-values in italics were nominally significant ( $P_\beta < 0.05$ ;  $P_\beta \geq 7.94 \times 10^{-04}$ ), p-values in bold were diet-wide significant ( $P_\beta < 7.94 \times 10^{-04}$ ).  $R^2$  – partial  $R^2$  value ( $R_B^2$ ) converted to a percentage ( $R^2 * 100$ ).  $P_Q$  – p-value for the heterogeneity Q-statistic generated during the meta-analysis, if  $P_Q < 0.1$  a random-effect model was used in the meta-analysis. \* – indicates not all data-sets were included in the analysis, the number of asterisks represents the number of data-sets missing data.

### **Table S6. Diet-wide association study results for the original and diet quality score adjusted analyses in the male-only cohort.**

n – number of participants analysed.  $\beta$  – inverse-variance weighted meta-analysis beta value, reflecting the change in serum urate level ( $\mu\text{mol/L}$ ) per one extra serve per week of the food item. 95% CI – 95% confidence intervals of the beta value.  $P_\beta$  – p-value for meta-analysis beta value, p-values in italics were nominally significant ( $P_\beta < 0.05$ ;  $P_\beta \geq 7.94 \times 10^{-04}$ ), p-values in bold were diet-wide significant ( $P_\beta < 7.94 \times 10^{-04}$ ).  $R^2$  – partial  $R^2$  value ( $R_B^2$ ) converted to a percentage ( $R^2 * 100$ ).  $P_Q$  – p-value for the heterogeneity Q-statistic generated during the meta-analysis, if  $P_Q < 0.1$  a random-effect model was used in the meta-analysis. \* – indicates not all data-sets were included in the analysis, the number of asterisks represents the number of data-sets missing data.

**Table S7. Diet-wide association study results for the original and diet quality score adjusted analyses in the female-only cohort.**

n – number of participants analysed.  $\beta$  – inverse-variance weighted meta-analysis beta value, reflecting the change in serum urate level ( $\mu\text{mol/L}$ ) per one extra serve per week of the food item. 95% CI – 95% confidence intervals of the beta value.  $P_\beta$  – p-value for meta-analysis beta value, p-values in italics were nominally significant ( $P_\beta < 0.05$ ;  $P_\beta \geq 7.94 \times 10^{-04}$ ), p-values in bold were diet-wide significant ( $P_\beta < 7.94 \times 10^{-04}$ ).  $R^2$  – partial  $R^2$  value ( $R_B^2$ ) converted to a percentage ( $R^2 * 100$ ).  $P_Q$  – p-value for the heterogeneity Q-statistic generated during the meta-analysis, if  $P_Q < 0.1$  a random-effect model was used in the meta-analysis. \* – indicates not all data-sets were included in the analysis, the number of asterisks represents the number of data-sets missing data.

**Table S8. Individual association results for the 30 SNPs used in the genetic risk score.**

NHANES III was unable to be included in these analyses owing to no genome-wide genotype data being available. Risk / Oth – risk or other allele. Freq – risk allele frequency. n – number of participants analysed.  $\beta$  – inverse-variance weighted meta-analysis beta value, reflecting the change in serum urate level ( $\mu\text{mol/L}$ ) per risk allele. 95% CI – 95% confidence intervals of the beta value.  $P_\beta$  – meta analysis p-value.  $R^2$  – partial  $R^2$  value converted to a percentage ( $R^2 * 100$ ).  $R^2_{\text{No}}$  –  $R^2$  for no additional diet quality score adjustment.  $R^2_{\text{HES}}$  –  $R^2$  for additional adjustment by the healthy eating score.  $R^2_{\text{DASH}}$  –  $R^2$  for additional adjustment by the DASH diet score.  $R^2_{\text{MDT}}$  –  $R^2$  for additional adjustment by the Mediterranean diet score.  $R^2_{\text{Factor}}$  –  $R^2$  for additional adjustment by the data-derived diet score.  $P_Q$  – p-value for the heterogeneity Q-statistic generated during the meta-analysis, if  $P_Q < 0.1$  a random-effect model was used in the meta-analysis.  $P_{\text{HWE}}$  - Hardy-Weinberg p-value for all cohorts combined. For the two SNPs with a  $P_{\text{HWE}} < 0.01$  (*rs653178* and *rs2079742*) all individual cohorts had a  $P_{\text{HWE}} \geq 0.02$ , except the ARIC cohort for *rs653178* ( $P_{\text{HWE}} = 1.56 \times 10^{-03}$ ).

**Table S9. Interaction between the four diet quality scores and the genetic risk score.**

NHANES III was unable to be included in these analyses owing to no genome-wide genotype data being available. n – number of participants analysed.  $\beta$  – inverse-variance weighted meta-analysis of the interaction beta value, reflecting the change in serum urate level ( $\mu\text{mol/L}$ ) per one unit increase in the diet score multiplied by the genetic risk score. 95% CI – 95% confidence intervals of the beta value.  $P_\beta$  – P-value for meta-analysis beta value, p-values in bold were considered significant ( $P_\beta < 0.05$ ).  $R^2$  – partial  $R^2$  value ( $R_B^2$ ) converted to a percentage ( $R^2 * 100$ ).  $P_Q$  – P-value for the heterogeneity Q-statistic generated during the meta-analysis, if  $P_Q < 0.1$  a random-effect model was used in the meta-analysis.



**Table S1. Demographic, anthropomorphic, and clinical summary for the five datasets.**

|                                             | ARIC                               | CARDIA            | CHS               | FHS               | NHANES III        |
|---------------------------------------------|------------------------------------|-------------------|-------------------|-------------------|-------------------|
| <b>Total Participants</b>                   | 6,258                              | 1,335             | 1,954             | 2,977             | 4,236             |
|                                             | <b>Baseline Information</b>        |                   |                   |                   |                   |
| <b>Sex (% Female)</b>                       | 2,802 (44.77%)                     | 735 (55.06%)      | 1,108 (56.70%)    | 1,593 (53.51%)    | 2,108 (49.76%)    |
| <b>Menopause Status (% Post Menopausal)</b> | 2,004 (71.52%)                     | 2 (0.27%)         | 1,108 (100.00%)   | 209 (13.12%)      | 1,030 (48.86%)    |
| <b>Age (Years)</b>                          | 54 ± 6                             | 26 ± 3            | 72 ± 5            | 40 ± 9            | 53 ± 20           |
| <b>BMI (kg/m<sup>2</sup>)</b>               | 26.51 ± 4.37                       | 23.61 ± 3.82      | 25.88 ± 4.15      | 26.50 ± 5.24      | 26.11 ± 5.03      |
| <b>Education (Years)</b>                    | 14.91 ± 4.13                       | 14.77 ± 2.31      | 14.35 ± 4.62      | 15.38 ± 2.53      | 12.37 ± 3.08      |
| <b>Smoking Status (% Current Smoker)</b>    | 1,796 (28.70%)                     | 315 (23.60%)      | 245 (12.54%)      | 472 (15.85%)      | 1,157 (27.31%)    |
| <b>Smoking Status (% Ex-Smoker)</b>         | 2,279 (36.42%)                     | 241 (18.05%)      | 793(40.58%)       | 798 (26.81%)      | 1,426 (33.66%)    |
| <b>Exercise (% Moderately Active)</b>       | 2,429 (38.81%)                     | 523 (39.18%)      | 728 (37.26%)      | 1,151 (38.66%)    | 869 (20.51%)      |
| <b>Exercise (% Very Active)</b>             | 794 (12.69%)                       | 556 (41.65%)      | 218 (11.16%)      | 1,428 (47.97%)    | 186 (4.39%)       |
| <b>Serum Urate (μmol/L)</b>                 | 347.51 ± 81.56                     | 314.46 ± 78.43    | 317.55 ± 78.24    | 308.08 ± 85.81    | 312.58 ± 79.51    |
| <b>SNPs Genotyped</b>                       | 837,177                            | 718,694           | 327,014           | 549,726           | -                 |
| <b>Average Calorie Intake (kcal/day)</b>    | 1,657.72 ± 607.55                  | 2,363.99 ± 802.78 | 1,819.11 ± 643.22 | 2,080.89 ± 683.79 | 2,021.48 ± 772.55 |
|                                             | <b>Self-Reported Comorbidities</b> |                   |                   |                   |                   |
| <b>Diabetes</b>                             | 245 (3.92%)                        | 7 (0.53%)         | 121 (6.22%)       | 30 (1.01%)        | 228 (5.39%)       |
| <b>High Blood Pressure</b>                  | 1305 (20.97%)                      | 100 (7.55%)       | 346 (17.81%)      | 198 (6.65%)       | 943 (22.31%)      |
| <b>High Cholesterol</b>                     | 1315 (21.60%)                      | 33 (2.54%)        | 76 (3.89%)        | 220 (7.39%)       | 930 (34.39%)      |
| <b>Heart Problems</b>                       | 776 (12.40%)                       | 77 (5.82%)        | 180 (9.21%)       | 296 (9.94%)       | 336 (7.93%)       |

Table S2. Food frequency questionnaire answer categories and serves per week conversion factor.

| No. | ARIC             |            | CARDIA      |            | CHS              |            | FHS                 |            | NHANES III  |                                          |
|-----|------------------|------------|-------------|------------|------------------|------------|---------------------|------------|-------------|------------------------------------------|
|     | Category         | Conversion | Category    | Conversion | Category         | Conversion | Category            | Conversion | Category    | Conversion                               |
| 1   | Almost never     | 0          | Serves/week | -          | Never            | 0          | Never, or < 1/month | 0          | Times/month | Divided by 4.33<br>(average weeks/month) |
| 2   | 1-3 serves/month | 0.47       |             |            | 5-10 times/year  | 0.14       | 1-3 serves/month    | 0.47       |             |                                          |
| 3   | 1 serve/week     | 1          |             |            | 1-3 times/month  | 0.47       | 1 serve/week        | 1          |             |                                          |
| 4   | 2-4 serves/week  | 3          |             |            | 1-4 times/week   | 2.5        | 2-4 serves/week     | 3          |             |                                          |
| 5   | 5-6 serves/week  | 5.5        |             |            | Almost every day | 6          | 5-6 serves/week     | 5.5        |             |                                          |
| 6   | 1 serve/day      | 7          |             |            |                  |            | 1 serve/day         | 7          |             |                                          |
| 7   | 2-3 serves/day   | 17.5       |             |            |                  |            | 2-3 serves/day      | 17.5       |             |                                          |
| 8   | 4-6 serves/day   | 35         |             |            |                  |            | 4-5 serves/day      | 31.5       |             |                                          |
| 9   | >6 serves/day    | 42         |             |            |                  |            | ≥ 6 serves/day      | 42         |             |                                          |

Table S3. Summary of 63 comparable food items and their study-specific food frequency questions.

| Food Item                 | ARIC                                                                                      | CARDIA                                                        | CHS                                                                            | FHS                                                                                   | NHANES III                                                                                                                |
|---------------------------|-------------------------------------------------------------------------------------------|---------------------------------------------------------------|--------------------------------------------------------------------------------|---------------------------------------------------------------------------------------|---------------------------------------------------------------------------------------------------------------------------|
| <b>Beer</b>               | Beer                                                                                      | Beer/Ales                                                     | Beer                                                                           | Beer                                                                                  | Beer/Lite Beer                                                                                                            |
| <b>Liquor</b>             | Hard Liquor                                                                               | Distilled Liquor;<br>Cordial and Liqueur                      | Liquor                                                                         | Liquor/Whiskey/Gin                                                                    | Hard Liquor/Tequila/Gm/Whiskey                                                                                            |
| <b>Wine</b>               | Wine                                                                                      | Wine                                                          | Wine                                                                           | Red Wine;<br>White Wine                                                               | Wine/Wine Coolers/Champagne                                                                                               |
| <b>Citrus Juice</b>       | Orange Juice/Grapefruit Juice                                                             | Citrus Juice                                                  | Orange Juice/Grapefruit Juice                                                  | Orange Juice;<br>Grapefruit Juice                                                     | Orange Juice/Grapefruit Juice/Tangerine Juice                                                                             |
| <b>Non-Citrus Juice</b>   | Fruit Punch                                                                               | Non-Citrus Fruit Juice;<br>Fruit Drinks;<br>Flavoured Water   | Tang/Breakfast Drinks;<br>Other Fruit Juice/Fruit Drink                        | Apple Juice/Cider;<br>Other Fruit Juice/Fruit Drink                                   | Apple Juice/Grape Juice/Cranberry Juice/Other Fruit Juice;<br>Hi-C/Tang/Hawaiian Punch/Kool-Aid;<br>Fruit Drink/Fruit Pop |
| <b>Coffee</b>             | Coffee                                                                                    | Coffee                                                        | Coffee                                                                         | Coffee                                                                                | Coffee                                                                                                                    |
| <b>Tea</b>                | Hot Tea/iced Tea                                                                          | Tea                                                           | Hot Tea/iced Tea                                                               | Non-Herbal Tea                                                                        | Tea                                                                                                                       |
| <b>Diet Soft Drink</b>    | Diet Soft Drink                                                                           | Diet Soft Drinks;<br>Unsweetened Soft Drinks                  | Diet Soft Drinks                                                               | Diet Cola;<br>Diet Soft Drink                                                         | Diet Cola/Diet Soda                                                                                                       |
| <b>Soft Drink</b>         | Regular Soft Drink                                                                        | Sweetened Soft Drinks                                         | Regular Soft Drinks                                                            | Cola;<br>Soft Drink                                                                   | Cola/Soda                                                                                                                 |
| <b>Butter</b>             | Butter (as spread)                                                                        | Butter;<br>Reduced Fat Butter                                 | Butter (as spread)                                                             | Butter (as spread)                                                                    | Butter (as spread)                                                                                                        |
| <b>Cheese</b>             | Cheese;<br>Cottage Cheese/Ricotta                                                         | Cheese/Processed Cheese/Cottage Cheese/Ricotta                | Cheese/Cheese Spread;<br>Cottage Cheese                                        | Cheddar Cheese/American Cheese;<br>Cottage Cheese/ Ricotta;<br>Cream Cheese           | American Cheese/Swiss Cheese/Cheddar Cheese/Cottage Cheese                                                                |
| <b>**Cream</b>            | -                                                                                         | Cream/Sour Cream                                              | Cream                                                                          | Cream;<br>Sour Cream                                                                  | -                                                                                                                         |
| <b>Ice Cream</b>          | Ice Cream                                                                                 | Ice Cream/Frozen Shakes                                       | Ice Cream                                                                      | Ice Cream                                                                             | Ice Cream/Ice Milk/Milkshakes                                                                                             |
| <b>**Flavoured Milk</b>   | -                                                                                         | Flavoured Milk;<br>Flavoured Milk Powder                      | -                                                                              | Sherbet Milk/Ice Milk                                                                 | Chocolate Milk/Hot Cocoa                                                                                                  |
| <b>Skim Milk</b>          | Skim Milk/Low-fat Milk                                                                    | Reduced-Fat Milk;<br>Low-Fat Milk/fat-Free Milk               | 2% Milk;<br>Skim Milk/1% Milk/Buttermilk                                       | Skim Milk/Low-fat Milk                                                                | 2% Milk/Low-fat Milk/1% Milk/Skim Milk/Non-Fat Milk/Buttermilk                                                            |
| <b>Whole Milk</b>         | Whole Milk                                                                                | Whole Milk                                                    | Whole Milk                                                                     | Whole Milk/Regular Milk                                                               | Whole Milk/Regular Milk                                                                                                   |
| <b>Yoghurt</b>            | Yoghurt                                                                                   | Yoghurt                                                       | Flavoured Yoghurt                                                              | Yoghurt                                                                               | Yoghurt/Frozen Yoghurt                                                                                                    |
| <b>Cake/Pie</b>           | Doughnuts;<br>Danish/Sweet Roll/Coffee Cake/Pastries;<br>Cake/Brownie;<br>Cookies;<br>Pie | Cake/Cookies/Pies/Pastries/Danish/ Doughnuts/Cobblers         | Doughnuts/Cookies/Cakes/Pastry;<br>Pumpkin Pie/Sweet Potato Pie;<br>Other Pies | Cookies;<br>Brownies;<br>Doughnuts;<br>Sweet Roll/Coffee Cake/Pastry;<br>Cake;<br>Pie | Cakes/Cookies/Brownies/ Pies/Doughnuts/Pastries                                                                           |
| <b>*Candy</b>             | Non-Chocolate Candy;<br>Jam/Jelly                                                         | Non-Chocolate Candy;<br>Syrup/Honey/Jam/Jelly                 | Non-Chocolate Candy/<br>Jelly/Honey/Brown Sugar                                | Non-Chocolate Candy;<br>Jams/ Jellies/Syrup/Honey/Preserves                           | -                                                                                                                         |
| <b>Chocolate</b>          | Chocolate Bar/Chocolate Pieces                                                            | Chocolate Candy                                               | Chocolate Candy                                                                | Chocolate Bars/Chocolate Pieces;<br>Chocolate Candy                                   | Chocolate Candy/Fudge                                                                                                     |
| <b>Muffins/Corn Bread</b> | Biscuits/Combread;<br>Muffins                                                             | Quick Breads/Corn Muffins/Pancakes/Waffles/Croissant/Tortilla | Biscuits/Muffins/Burger Rolls;<br>Corn Bread/Corn Muffins/Corn Tortillas       | English Muffins/Rolls/Bagels;<br>Muffins/Biscuits;<br>Pancakes/Waffles                | Corn Bread/Corn Muffins/Corn Tortillas                                                                                    |
| <b>Fish</b>               | Dark Meat Fish;<br>Other Fish;<br>Canned Tuna Fish                                        | Fresh Fish/Smoked Fish                                        | Baked Fish/Broiled Fish;<br>Tuna Fish/Tuna Salad/Tuna Casserole                | Dark-Meat Fish;<br>Other Fish;<br>Canned Tuna Fish                                    | Fish Fillets/Fish Sticks/ Fish Sandwiches/Tuna                                                                            |
| <b>Shellfish</b>          | Shrimp/Lobster/Scallops                                                                   | Shellfish                                                     | Shell Fish/Shrimp/ Lobster/Crab/Oysters                                        | Shrimp/ Lobster/Scallops                                                              | Shrimp/Clams/Oysters/ Crab/Lobsters                                                                                       |
| <b>Citrus Fruit</b>       | Oranges                                                                                   | Oranges/Grapefruit/Tangerine/ Lemon                           | Oranges;<br>Grapefruit;<br>Lemon                                               | Oranges;<br>Grapefruit                                                                | Oranges/Grapefruit/ Tangerines                                                                                            |

|                              |                                                                     |                                                                  |                                                                                                                                     |                                                                                                                                                  |                                                                                                                            |
|------------------------------|---------------------------------------------------------------------|------------------------------------------------------------------|-------------------------------------------------------------------------------------------------------------------------------------|--------------------------------------------------------------------------------------------------------------------------------------------------|----------------------------------------------------------------------------------------------------------------------------|
| <b>Non-Citrus Fruit</b>      | Apples/Pears;<br>Bananas;<br>Peaches/Apricots/Plums;<br>Other Fruit | Non-Citrus Fruits                                                | Apples/Applesauce/Pears;<br>Bananas;<br>Strawberries;<br>Cantaloupe;<br>Watermelon;<br>Apricots/Peaches/Nectarines;<br>Other Fruits | Apples/Pears;<br>Bananas;<br>Strawberries;<br>Blueberries;<br>Cantaloupe;<br>Watermelon;<br>Peaches/Apricots/Plums;<br>Raisins/Grapes;<br>Prunes | Apple/Banana/Pear/Berries/Cherries/Grapes/Plum/Other Fruits;<br>Cantaloupe/Honeydew/Watermelon;<br>Peach/Nectarine/Apricot |
|                              | <b>**Apple/Pear</b>                                                 | Apples/Pears                                                     | Apples/Applesauce/Pears                                                                                                             | Apples/Pears                                                                                                                                     | -                                                                                                                          |
|                              | <b>**Banana</b>                                                     | Bananas                                                          | Bananas                                                                                                                             | Bananas                                                                                                                                          | -                                                                                                                          |
|                              | <b>**Melon</b>                                                      | -                                                                | Cantaloupe;<br>Watermelon                                                                                                           | Cantaloupe;<br>Watermelon                                                                                                                        | Cantaloupe/Honeydew/Watermelon                                                                                             |
|                              | <b>*Peach</b>                                                       | Peaches/Apricots/Plums                                           | Apricots/Nectarines/Peaches                                                                                                         | Peaches/Apricots/Plums                                                                                                                           | Peach/Nectarine/Apricot                                                                                                    |
|                              | <b>Brown Bread</b>                                                  | Dark Bread/Whole Grain Bread                                     | Dark Bread/Whole Wheat/Rye/Pumpernickel                                                                                             | Dark Bread                                                                                                                                       | Dark Bread/Whole Wheat/Rye/Pumpernickel                                                                                    |
|                              | <b>White Bread</b>                                                  | White Bread;<br>Crackers                                         | White Bread/Bagels/Crackers                                                                                                         | White Bread;<br>Crackers/Triskets/Wheat Thins                                                                                                    | White Bread/Rolls/Bagels/Crackers                                                                                          |
|                              | <b>Cold Cereal</b>                                                  | Cold Breakfast Cereal                                            | Bran Cereal/Granola Cereal;<br>Cold Cereal;<br>Fortified Cereal                                                                     | Cold Breakfast Cereal                                                                                                                            | Bran Cereal;<br>Fortified Cereal;<br>Cold Cereals                                                                          |
|                              | <b>*Cooked Cereal</b>                                               | Cooked Cereal/Oatmeal/ Grits/Cream of Wheat                      | Cooked Cereal                                                                                                                       | Cooked Oatmeal;<br>Cooked Breakfast Cereal                                                                                                       | Cooked Cereals/Oatmeal/Cream of Wheat/Cream of Rice/Grits                                                                  |
|                              | <b>Pasta</b>                                                        | Spaghetti/Noodles/Other Pasta                                    | Spaghetti/Lasagne/Pasta                                                                                                             | Spaghetti/Pasta                                                                                                                                  | Spaghetti/Pasta                                                                                                            |
| <b>*Rice</b>                 | Rice                                                                | Rice                                                             | Brown Rice;<br>White Rice                                                                                                           | Rice                                                                                                                                             |                                                                                                                            |
| <b>Legumes</b>               | Beans/Lentils/Pinto Beans/Baked Beans                               | Legumes/Dried Beans                                              | Baked Beans/Pinto Beans/Kidney Beans                                                                                                | Beans/Lentils/Chickpeas                                                                                                                          |                                                                                                                            |
| <b>**Nuts</b>                | Nuts                                                                | Nuts/Seeds                                                       | -                                                                                                                                   | Nuts                                                                                                                                             |                                                                                                                            |
| <b>*Peanuts</b>              | Peanut Butter                                                       | Nut Butter/Seed Butter                                           | Peanut Butter                                                                                                                       | -                                                                                                                                                |                                                                                                                            |
| <b>*Bacon</b>                | Bacon                                                               | Cured Pork;<br>Lean Cured Pork                                   | Bacon                                                                                                                               | Bacon                                                                                                                                            |                                                                                                                            |
| <b>Beef/Pork/Lamb</b>        | Beef/Pork/Lamb                                                      | Beef;<br>Lean Beef;<br>Lamb;<br>Lean Lamb;<br>Pork;<br>Lean Pork | Beef;<br>Pork                                                                                                                       | Beef;<br>Pork/Ham                                                                                                                                |                                                                                                                            |
| <b>**Hamburger</b>           | Hamburger                                                           | Hamburger                                                        | Hamburger/Cheesburger/Meat Loaf                                                                                                     | -                                                                                                                                                |                                                                                                                            |
| <b>**Hotdog</b>              | Hotdogs                                                             | Hotdogs                                                          | Hotdogs                                                                                                                             | -                                                                                                                                                |                                                                                                                            |
| <b>Organ Meats</b>           | Liver                                                               | Organ Meat                                                       | Liver/Chicken Liver                                                                                                                 | Liver/Organ Meats                                                                                                                                |                                                                                                                            |
| <b>*Sausage/Lunch Meat</b>   | Processed Meat/Sausage/ Salami/Bologna                              | Cold Cuts/Sausage;<br>Lean Cold Cuts/Lean Sausage                | Liverwurst;<br>Ham/Lunch Meat;<br>Sausage                                                                                           | Processed Meats/Sausage/ Salami/Bologna                                                                                                          |                                                                                                                            |
| <b>Poultry</b>               | Chicken/Turkey                                                      | Poultry;<br>Lean Poultry                                         | Chicken/Turkey                                                                                                                      | Chicken/Turkey                                                                                                                                   |                                                                                                                            |
| <b>*Cabbage/ Cauliflower</b> | Cabbage/Cauliflower/Brussel Sprout                                  | Cabbage/Cauliflower/Brussel Sprout                               | Cabbage/Coleslaw;<br>Cauliflower;<br>Brussel Sprouts                                                                                | Brussel Sprouts/Cauliflower;<br>Cabbage/Coleslaw/Sauerkraut                                                                                      |                                                                                                                            |
| <b>*Broccoli</b>             | Broccoli                                                            | Broccoli                                                         | Broccoli                                                                                                                            | Broccoli                                                                                                                                         |                                                                                                                            |
| <b>*Carrot</b>               | Carrots                                                             | Carrots                                                          | Carrots                                                                                                                             | Carrots                                                                                                                                          |                                                                                                                            |
| <b>**Corn</b>                | Corn                                                                | Corn                                                             | Corn                                                                                                                                | -                                                                                                                                                |                                                                                                                            |
| <b>**Lettuce</b>             | -                                                                   | Green Salad                                                      | Iceberg Lettuce/Lettuce Head;<br>Romaine Lettuce/Leaf Lettuce                                                                       | Tossed Salad                                                                                                                                     |                                                                                                                            |
| <b>**Peas</b>                | Peas/Lima Beans                                                     | Peas                                                             | Peas                                                                                                                                | Peas/Lima Beans                                                                                                                                  |                                                                                                                            |

|                              |                                                   |                                                                                           |                                                                   |                                                |
|------------------------------|---------------------------------------------------|-------------------------------------------------------------------------------------------|-------------------------------------------------------------------|------------------------------------------------|
| <b>Potato</b>                | Mashed Potato;<br>French Fried Potato             | Boiled Potato/Boiled Potato;<br>French Fries/Fried Potatoes                               | Baked Potato/Boiled Potato/Mashed Potato;<br>French Fried Potato  | Baked Potato/Mashed Potato/French-Fried Potato |
| <b>Spinach</b>               | Spinach/Collards/Greens                           | Spinach;<br>Mustard Greens/Turnip Greens/Collards                                         | Spinach;<br>Kale/Mustard/Chard Greens                             | Spinach/Greens/Collards/Kale                   |
| <b>**String Beans</b>        | String Beans/Green Beans<br>Tomatoes/Tomato Juice | String Beans/Green Beans<br>Tomatoes/Tomato Juice                                         | String Beans<br>Tomatoes;<br>Tomato Juice                         | -<br>Tomatoes/Tomato Juice/Salsa               |
| <b>Winter Squash</b>         | Dark Yellow Winter Squash;<br>Sweet Potato        | Pumpkin/Sweet Potato/Winter Squash                                                        | Winter Squash/Baked Squash;<br>Sweet Potato/Yam                   | Sweet Potatoes/Yams/Orange Squash/Pumpkin      |
| <b>Other Food Items</b>      |                                                   |                                                                                           |                                                                   |                                                |
| <b>**Creamer</b>             | -                                                 | Non-Dairy Cream                                                                           | Non-Dairy Coffee Whitener                                         | -                                              |
| <b>Margarine</b>             | Margarine/Butter Blend (as spread)                | Margarine;<br>Reduced-Fat Margarine                                                       | Margarine (as spread)                                             | Margarine (as spread)                          |
| <b>*Mayonnaise/ Dressing</b> | -                                                 | Salad Dressing/Mayonnaise                                                                 | Salad Dressing/Mayonnaise                                         | Mayonnaise/Salad Dressing                      |
| <b>Eggs</b>                  | Eggs                                              | Eggs                                                                                      | Eggs                                                              | Eggs                                           |
| <b>Chips/Popcorn</b>         | Potato Chips/Corn Chips;<br>Popcorn               | Snack Chips;<br>Popcorn;<br>Flavoured Popcorn;<br>Potato Chips/Onion Rings/Savoury Snacks | Salty Snacks/Chips/Popcorn<br>Potato Chips/Corn Chips;<br>Popcorn | Potato Chips/Corn Chips/ Pretzels/Popcorn      |
| <b>*Condiments</b>           | Catsup/Hot Sauce/Soy Sauce/Steak Sauce            | Catsup/Barbeque Sauce/Mustard                                                             | Red Chili Sauce/Taco Sauce/Salsa Picante                          | -                                              |
| <b>*Table Sugar</b>          | Sugar Added to Food/Beverages                     | Sugar                                                                                     | Sugar Added to Cereal/Beverages                                   | -                                              |

Table S4. Summary of the average consumption frequency for 63 food items after conversion to serves per week.

| Food Item                      | CARDIA study  |                   |                  |                  | CHS           |                   |                   |                  | FHS           |                   |                   |                  | NHANES III    |                   |                   |  |
|--------------------------------|---------------|-------------------|------------------|------------------|---------------|-------------------|-------------------|------------------|---------------|-------------------|-------------------|------------------|---------------|-------------------|-------------------|--|
|                                | Mean ± S.D.   | Median (Min, Max) | Female (n = 795) | Male (n = 600)   | Mean ± S.D.   | Median (Min, Max) | Female (n = 1108) | Male (n = 1384)  | Mean ± S.D.   | Median (Min, Max) | Female (n = 1593) | Male (n = 2178)  | Mean ± S.D.   | Median (Min, Max) | Female (n = 2108) |  |
| <b>Alcoholic Beverages</b>     |               |                   |                  |                  |               |                   |                   |                  |               |                   |                   |                  |               |                   |                   |  |
| Beer                           | 6.94 ± 6.80   | 0.00(0.00-32.00)  | 0.46 ± 2.11      | 0.00(0.00-42.00) | 0.46 ± 2.11   | 0.00(0.00-42.00)  | 0.46 ± 2.11       | 0.00(0.00-42.00) | 0.46 ± 2.11   | 0.00(0.00-42.00)  | 0.46 ± 2.11       | 0.00(0.00-42.00) | 0.46 ± 2.11   | 0.00(0.00-42.00)  | 0.46 ± 2.11       |  |
| Liquor                         | 1.69 ± 2.49   | 0.00(0.00-56.00)  | 0.80 ± 2.40      | 0.00(0.00-80.00) | 0.80 ± 2.40   | 0.00(0.00-80.00)  | 0.80 ± 2.40       | 0.00(0.00-80.00) | 0.80 ± 2.40   | 0.00(0.00-80.00)  | 0.80 ± 2.40       | 0.00(0.00-80.00) | 0.80 ± 2.40   | 0.00(0.00-80.00)  | 0.80 ± 2.40       |  |
| Wine                           | 0.59 ± 1.78   | 0.00(0.00-21.00)  | 0.67 ± 2.01      | 0.00(0.00-30.00) | 0.67 ± 2.01   | 0.00(0.00-30.00)  | 0.67 ± 2.01       | 0.00(0.00-30.00) | 0.67 ± 2.01   | 0.00(0.00-30.00)  | 0.67 ± 2.01       | 0.00(0.00-30.00) | 0.67 ± 2.01   | 0.00(0.00-30.00)  | 0.67 ± 2.01       |  |
| <b>Non-Alcoholic Beverages</b> |               |                   |                  |                  |               |                   |                   |                  |               |                   |                   |                  |               |                   |                   |  |
| Citrus Juice                   | 3.72 ± 4.60   | 0.00(0.00-42.00)  | 3.74 ± 4.15      | 0.00(0.00-42.00) | 3.74 ± 4.15   | 0.00(0.00-42.00)  | 3.74 ± 4.15       | 0.00(0.00-42.00) | 3.74 ± 4.15   | 0.00(0.00-42.00)  | 3.74 ± 4.15       | 0.00(0.00-42.00) | 3.74 ± 4.15   | 0.00(0.00-42.00)  | 3.74 ± 4.15       |  |
| Non-Citrus Juice               | 1.05 ± 2.79   | 0.00(0.00-42.00)  | 0.77 ± 2.66      | 0.00(0.00-42.00) | 0.77 ± 2.66   | 0.00(0.00-42.00)  | 0.77 ± 2.66       | 0.00(0.00-42.00) | 0.77 ± 2.66   | 0.00(0.00-42.00)  | 0.77 ± 2.66       | 0.00(0.00-42.00) | 0.77 ± 2.66   | 0.00(0.00-42.00)  | 0.77 ± 2.66       |  |
| Coffee                         | 15.69 ± 14.47 | 0.00(0.00-42.00)  | 13.47 ± 13.95    | 0.00(0.00-42.00) | 13.47 ± 13.95 | 0.00(0.00-42.00)  | 13.47 ± 13.95     | 0.00(0.00-42.00) | 13.47 ± 13.95 | 0.00(0.00-42.00)  | 13.47 ± 13.95     | 0.00(0.00-42.00) | 13.47 ± 13.95 | 0.00(0.00-42.00)  | 13.47 ± 13.95     |  |
| Tea                            | 4.03 ± 7.33   | 0.00(0.00-42.00)  | 4.78 ± 7.82      | 0.00(0.00-42.00) | 4.78 ± 7.82   | 0.00(0.00-42.00)  | 4.78 ± 7.82       | 0.00(0.00-42.00) | 4.78 ± 7.82   | 0.00(0.00-42.00)  | 4.78 ± 7.82       | 0.00(0.00-42.00) | 4.78 ± 7.82   | 0.00(0.00-42.00)  | 4.78 ± 7.82       |  |
| Diet Soft Drink                | 3.49 ± 6.35   | 0.00(0.00-42.00)  | 2.92 ± 8.13      | 0.00(0.00-80.95) | 2.92 ± 8.13   | 0.00(0.00-80.95)  | 2.92 ± 8.13       | 0.00(0.00-80.95) | 2.92 ± 8.13   | 0.00(0.00-80.95)  | 2.92 ± 8.13       | 0.00(0.00-80.95) | 2.92 ± 8.13   | 0.00(0.00-80.95)  | 2.92 ± 8.13       |  |
| Soft Drink                     | 2.93 ± 5.23   | 0.00(0.00-42.00)  | 1.76 ± 4.50      | 0.00(0.00-42.00) | 1.76 ± 4.50   | 0.00(0.00-42.00)  | 1.76 ± 4.50       | 0.00(0.00-42.00) | 1.76 ± 4.50   | 0.00(0.00-42.00)  | 1.76 ± 4.50       | 0.00(0.00-42.00) | 1.76 ± 4.50   | 0.00(0.00-42.00)  | 1.76 ± 4.50       |  |
| Butter                         | 2.59 ± 5.43   | 0.00(0.00-42.00)  | 2.48 ± 5.39      | 0.00(0.00-42.00) | 2.48 ± 5.39   | 0.00(0.00-42.00)  | 2.48 ± 5.39       | 0.00(0.00-42.00) | 2.48 ± 5.39   | 0.00(0.00-42.00)  | 2.48 ± 5.39       | 0.00(0.00-42.00) | 2.48 ± 5.39   | 0.00(0.00-42.00)  | 2.48 ± 5.39       |  |
| Cheese                         | 3.54 ± 3.83   | 0.00(0.00-70.00)  | 3.93 ± 3.89      | 0.00(0.00-38.00) | 3.93 ± 3.89   | 0.00(0.00-38.00)  | 3.93 ± 3.89       | 0.00(0.00-38.00) | 3.93 ± 3.89   | 0.00(0.00-38.00)  | 3.93 ± 3.89       | 0.00(0.00-38.00) | 3.93 ± 3.89   | 0.00(0.00-38.00)  | 3.93 ± 3.89       |  |
| Ice-Cream                      | 1.77 ± 2.50   | 0.00(0.00-42.00)  | 1.42 ± 2.54      | 0.00(0.00-42.00) | 1.42 ± 2.54   | 0.00(0.00-42.00)  | 1.42 ± 2.54       | 0.00(0.00-42.00) | 1.42 ± 2.54   | 0.00(0.00-42.00)  | 1.42 ± 2.54       | 0.00(0.00-42.00) | 1.42 ± 2.54   | 0.00(0.00-42.00)  | 1.42 ± 2.54       |  |
| ***Ice-Cream                   | 2.56 ± 7.06   | 0.00(0.00-42.00)  | 1.42 ± 2.54      | 0.00(0.00-42.00) | 1.42 ± 2.54   | 0.00(0.00-42.00)  | 1.42 ± 2.54       | 0.00(0.00-42.00) | 1.42 ± 2.54   | 0.00(0.00-42.00)  | 1.42 ± 2.54       | 0.00(0.00-42.00) | 1.42 ± 2.54   | 0.00(0.00-42.00)  | 1.42 ± 2.54       |  |
| Skin Milk                      | 1.11 ± 2.39   | 0.00(0.00-35.00)  | 0.29 ± 2.39      | 0.00(0.00-25.86) | 0.29 ± 2.39   | 0.00(0.00-25.86)  | 0.29 ± 2.39       | 0.00(0.00-25.86) | 0.29 ± 2.39   | 0.00(0.00-25.86)  | 0.29 ± 2.39       | 0.00(0.00-25.86) | 0.29 ± 2.39   | 0.00(0.00-25.86)  | 0.29 ± 2.39       |  |
| Whole Milk                     | 1.79 ± 4.40   | 0.00(0.00-42.00)  | 0.93 ± 3.15      | 0.00(0.00-42.00) | 0.93 ± 3.15   | 0.00(0.00-42.00)  | 0.93 ± 3.15       | 0.00(0.00-42.00) | 0.93 ± 3.15   | 0.00(0.00-42.00)  | 0.93 ± 3.15       | 0.00(0.00-42.00) | 0.93 ± 3.15   | 0.00(0.00-42.00)  | 0.93 ± 3.15       |  |
| Yoghurt                        | 0.36 ± 1.27   | 0.00(0.00-17.50)  | 0.85 ± 1.93      | 0.00(0.00-35.00) | 0.85 ± 1.93   | 0.00(0.00-35.00)  | 0.85 ± 1.93       | 0.00(0.00-35.00) | 0.85 ± 1.93   | 0.00(0.00-35.00)  | 0.85 ± 1.93       | 0.00(0.00-35.00) | 0.85 ± 1.93   | 0.00(0.00-35.00)  | 0.85 ± 1.93       |  |
| Cake/Pie                       | 6.36 ± 6.64   | 0.00(0.00-42.00)  | 5.04 ± 5.69      | 0.00(0.00-35.00) | 5.04 ± 5.69   | 0.00(0.00-35.00)  | 5.04 ± 5.69       | 0.00(0.00-35.00) | 5.04 ± 5.69   | 0.00(0.00-35.00)  | 5.04 ± 5.69       | 0.00(0.00-35.00) | 5.04 ± 5.69   | 0.00(0.00-35.00)  | 5.04 ± 5.69       |  |
| *Candy                         | 0.99 ± 2.44   | 0.00(0.00-42.00)  | 0.94 ± 2.04      | 0.00(0.00-35.00) | 0.94 ± 2.04   | 0.00(0.00-35.00)  | 0.94 ± 2.04       | 0.00(0.00-35.00) | 0.94 ± 2.04   | 0.00(0.00-35.00)  | 0.94 ± 2.04       | 0.00(0.00-35.00) | 0.94 ± 2.04   | 0.00(0.00-35.00)  | 0.94 ± 2.04       |  |
| Chocolate                      | 1.77 ± 2.73   | 0.00(0.00-42.00)  | 1.89 ± 3.18      | 0.00(0.00-42.00) | 1.89 ± 3.18   | 0.00(0.00-42.00)  | 1.89 ± 3.18       | 0.00(0.00-42.00) | 1.89 ± 3.18   | 0.00(0.00-42.00)  | 1.89 ± 3.18       | 0.00(0.00-42.00) | 1.89 ± 3.18   | 0.00(0.00-42.00)  | 1.89 ± 3.18       |  |
| Muffins/Com Bread              | 1.16 ± 2.28   | 0.00(0.00-35.00)  | 0.93 ± 1.76      | 0.00(0.00-17.97) | 0.93 ± 1.76   | 0.00(0.00-17.97)  | 0.93 ± 1.76       | 0.00(0.00-17.97) | 0.93 ± 1.76   | 0.00(0.00-17.97)  | 0.93 ± 1.76       | 0.00(0.00-17.97) | 0.93 ± 1.76   | 0.00(0.00-17.97)  | 0.93 ± 1.76       |  |
| Fish                           | 1.62 ± 1.78   | 0.00(0.00-18.44)  | 1.92 ± 1.93      | 1.41(0.00-17.50) | 1.92 ± 1.93   | 1.41(0.00-17.50)  | 1.92 ± 1.93       | 1.41(0.00-17.50) | 1.92 ± 1.93   | 1.41(0.00-17.50)  | 1.92 ± 1.93       | 1.41(0.00-17.50) | 1.92 ± 1.93   | 1.41(0.00-17.50)  | 1.92 ± 1.93       |  |
| Shellfish                      | 0.25 ± 0.43   | 0.00(0.00-7.00)   | 0.22 ± 0.40      | 0.00(0.00-7.00)  | 0.22 ± 0.40   | 0.00(0.00-7.00)   | 0.22 ± 0.40       | 0.00(0.00-7.00)  | 0.22 ± 0.40   | 0.00(0.00-7.00)   | 0.22 ± 0.40       | 0.00(0.00-7.00)  | 0.22 ± 0.40   | 0.00(0.00-7.00)   | 0.22 ± 0.40       |  |
| Citrus Fruit                   | 1.47 ± 2.30   | 0.00(0.00-35.00)  | 1.77 ± 2.64      | 0.00(0.00-42.00) | 1.77 ± 2.64   | 0.00(0.00-42.00)  | 1.77 ± 2.64       | 0.00(0.00-42.00) | 1.77 ± 2.64   | 0.00(0.00-42.00)  | 1.77 ± 2.64       | 0.00(0.00-42.00) | 1.77 ± 2.64   | 0.00(0.00-42.00)  | 1.77 ± 2.64       |  |
| Non-Citrus Fruit               | 7.65 ± 8.09   | 0.00(0.00-35.00)  | 6.78 ± 8.32      | 0.00(0.00-42.00) | 6.78 ± 8.32   | 0.00(0.00-42.00)  | 6.78 ± 8.32       | 0.00(0.00-42.00) | 6.78 ± 8.32   | 0.00(0.00-42.00)  | 6.78 ± 8.32       | 0.00(0.00-42.00) | 6.78 ± 8.32   | 0.00(0.00-42.00)  | 6.78 ± 8.32       |  |
| **Ice-Cream                    | 2.91 ± 2.69   | 0.00(0.00-35.00)  | 3.48 ± 3.97      | 0.00(0.00-42.00) | 3.48 ± 3.97   | 0.00(0.00-42.00)  | 3.48 ± 3.97       | 0.00(0.00-42.00) | 3.48 ± 3.97   | 0.00(0.00-42.00)  | 3.48 ± 3.97       | 0.00(0.00-42.00) | 3.48 ± 3.97   | 0.00(0.00-42.00)  | 3.48 ± 3.97       |  |
| ***Biscuits                    | 2.27 ± 2.69   | 0.00(0.00-35.00)  | 2.89 ± 2.71      | 0.00(0.00-35.00) | 2.89 ± 2.71   | 0.00(0.00-35.00)  | 2.89 ± 2.71       | 0.00(0.00-35.00) | 2.89 ± 2.71   | 0.00(0.00-35.00)  | 2.89 ± 2.71       | 0.00(0.00-35.00) | 2.89 ± 2.71   | 0.00(0.00-35.00)  | 2.89 ± 2.71       |  |
| **Milk                         | 0.87 ± 1.66   | 0.00(0.00-17.50)  | 1.05 ± 1.86      | 0.00(0.00-17.50) | 1.05 ± 1.86   | 0.00(0.00-17.50)  | 1.05 ± 1.86       | 0.00(0.00-17.50) | 1.05 ± 1.86   | 0.00(0.00-17.50)  | 1.05 ± 1.86       | 0.00(0.00-17.50) | 1.05 ± 1.86   | 0.00(0.00-17.50)  | 1.05 ± 1.86       |  |
| *Peach                         | 6.14 ± 7.40   | 0.00(0.00-42.00)  | 6.11 ± 6.37      | 0.00(0.00-35.00) | 6.11 ± 6.37   | 0.00(0.00-35.00)  | 6.11 ± 6.37       | 0.00(0.00-35.00) | 6.11 ± 6.37   | 0.00(0.00-35.00)  | 6.11 ± 6.37       | 0.00(0.00-35.00) | 6.11 ± 6.37   | 0.00(0.00-35.00)  | 6.11 ± 6.37       |  |
| Brown Bread                    | 6.06 ± 7.95   | 0.00(0.00-42.00)  | 4.13 ± 6.26      | 0.00(0.00-42.00) | 4.13 ± 6.26   | 0.00(0.00-42.00)  | 4.13 ± 6.26       | 0.00(0.00-42.00) | 4.13 ± 6.26   | 0.00(0.00-42.00)  | 4.13 ± 6.26       | 0.00(0.00-42.00) | 4.13 ± 6.26   | 0.00(0.00-42.00)  | 4.13 ± 6.26       |  |
| White Bread                    | 3.51 ± 4.56   | 0.00(0.00-42.00)  | 3.15 ± 3.68      | 0.00(0.00-42.00) | 3.15 ± 3.68   | 0.00(0.00-42.00)  | 3.15 ± 3.68       | 0.00(0.00-42.00) | 3.15 ± 3.68   | 0.00(0.00-42.00)  | 3.15 ± 3.68       | 0.00(0.00-42.00) | 3.15 ± 3.68   | 0.00(0.00-42.00)  | 3.15 ± 3.68       |  |
| Cold Cereal                    | 0.96 ± 2.09   | 0.00(0.00-35.00)  | 1.11 ± 1.91      | 0.00(0.00-17.50) | 1.11 ± 1.91   | 0.00(0.00-17.50)  | 1.11 ± 1.91       | 0.00(0.00-17.50) | 1.11 ± 1.91   | 0.00(0.00-17.50)  | 1.11 ± 1.91       | 0.00(0.00-17.50) | 1.11 ± 1.91   | 0.00(0.00-17.50)  | 1.11 ± 1.91       |  |
| *Cooked Pasta                  | 1.00 ± 1.26   | 0.00(0.00-35.00)  | 1.05 ± 1.18      | 0.00(0.00-17.50) | 1.05 ± 1.18   | 0.00(0.00-17.50)  | 1.05 ± 1.18       | 0.00(0.00-17.50) | 1.05 ± 1.18   | 0.00(0.00-17.50)  | 1.05 ± 1.18       | 0.00(0.00-17.50) | 1.05 ± 1.18   | 0.00(0.00-17.50)  | 1.05 ± 1.18       |  |
| Pasta                          | 1.01 ± 1.53   | 0.00(0.00-35.00)  | 1.21 ± 1.53      | 0.00(0.00-17.50) | 1.21 ± 1.53   | 0.00(0.00-17.50)  | 1.21 ± 1.53       | 0.00(0.00-17.50) | 1.21 ± 1.53   | 0.00(0.00-17.50)  | 1.21 ± 1.53       | 0.00(0.00-17.50) | 1.21 ± 1.53   | 0.00(0.00-17.50)  | 1.21 ± 1.53       |  |
| *Rice                          | 0.90 ± 1.34   | 0.00(0.00-17.50)  | 0.66 ± 1.01      | 0.00(0.00-17.50) | 0.66 ± 1.01   | 0.00(0.00-17.50)  | 0.66 ± 1.01       | 0.00(0.00-17.50) | 0.66 ± 1.01   | 0.00(0.00-17.50)  | 0.66 ± 1.01       | 0.00(0.00-17.50) | 0.66 ± 1.01   | 0.00(0.00-17.50)  | 0.66 ± 1.01       |  |
| Legumes                        | 1.07 ± 2.03   | 0.00(0.00-35.00)  | 0.85 ± 1.91      | 0.00(0.00-42.00) | 0.85 ± 1.91   | 0.00(0.00-42.00)  | 0.85 ± 1.91       | 0.00(0.00-42.00) | 0.85 ± 1.91   | 0.00(0.00-42.00)  | 0.85 ± 1.91       | 0.00(0.00-42.00) | 0.85 ± 1.91   | 0.00(0.00-42.00)  | 0.85 ± 1.91       |  |
| **Nuts                         | 2.12 ± 3.72   | 0.00(0.00-42.00)  | 1.84 ± 2.86      | 0.00(0.00-35.00) | 1.84 ± 2.86   | 0.00(0.00-35.00)  | 1.84 ± 2.86       | 0.00(0.00-35.00) | 1.84 ± 2.86   | 0.00(0.00-35.00)  | 1.84 ± 2.86       | 0.00(0.00-35.00) | 1.84 ± 2.86   | 0.00(0.00-35.00)  | 1.84 ± 2.86       |  |
| **Peanuts                      | 1.15 ± 2.02   | 0.00(0.00-35.00)  | 0.99 ± 1.27      | 0.00(0.00-17.50) | 0.99 ± 1.27   | 0.00(0.00-17.50)  | 0.99 ± 1.27       | 0.00(0.00-17.50) | 0.99 ± 1.27   | 0.00(0.00-17.50)  | 0.99 ± 1.27       | 0.00(0.00-17.50) | 0.99 ± 1.27   | 0.00(0.00-17.50)  | 0.99 ± 1.27       |  |
| *Bacon                         | 3.02 ± 3.11   | 0.00(0.00-35.00)  | 2.99 ± 2.77      | 0.00(0.00-35.00) | 2.99 ± 2.77   | 0.00(0.00-35.00)  | 2.99 ± 2.77       | 0.00(0.00-35.00) | 2.99 ± 2.77   | 0.00(0.00-35.00)  | 2.99 ± 2.77       | 0.00(0.00-35.00) | 2.99 ± 2.77   | 0.00(0.00-35.00)  | 2.99 ± 2.77       |  |
| Beef/Pork/Lamb                 | 1.71 ± 1.62   | 0.00(0.00-17.50)  | 1.11 ± 1.11      | 0.00(0.00-17.50) | 1.11 ± 1.11   | 0.00(0.00-17.50)  | 1.11 ± 1.11       | 0.00(0.00-17.50) | 1.11 ± 1.11   | 0.00(0.00-17.50)  | 1.11 ± 1.11       | 0.00(0.00-17.50) | 1.11 ± 1.11   | 0.00(0.00-17.50)  | 1.11 ± 1.11       |  |
| **Ham/Burger                   | 0.78 ± 1.23   | 0.00(0.00-35.00)  | 0.44 ± 0.75      | 0.00(0.00-17.50) | 0.44 ± 0.75   | 0.00(0.00-17.50)  | 0.44 ± 0.75       | 0.00(0.00-17.50) | 0.44 ± 0.75   | 0.00(0.00-17.50)  | 0.44 ± 0.75       | 0.00(0.00-17.50) | 0.44 ± 0.75   | 0.00(0.00-17.50)  | 0.44 ± 0.75       |  |
| **Hotdog                       | 0.19 ± 0.19   | 0.00(0.00-17.50)  | 0.17 ± 0.18      | 0.00(0.00-17.50) | 0.17 ± 0.18   | 0.00(0.00-17.50)  | 0.17 ± 0.18       | 0.00(0.00-17.50) | 0.17 ± 0.18   | 0.00(0.00-17.50)  | 0.17 ± 0.18       | 0.00(0.00-17.50) | 0.17 ± 0.18   | 0.00(0.00-17.50)  | 0.17 ± 0.18       |  |
| Organ Meats                    | 1.79 ± 2.58   | 0.00(0.00-42.00)  |                  |                  |               |                   |                   |                  |               |                   |                   |                  |               |                   |                   |  |

Table S5: Diet-wide association study results for the original and diet quality score adjusted analyses in the full cohort.

| Food Item                   | No Diet Score Adjustment |                      |             |        | DASH Diet Score Adjustment |                      |             |        | Mediterranean Diet Score Adjustment |                      |             |        | Data-Derived Diet Score Adjustment |                      |             |        |
|-----------------------------|--------------------------|----------------------|-------------|--------|----------------------------|----------------------|-------------|--------|-------------------------------------|----------------------|-------------|--------|------------------------------------|----------------------|-------------|--------|
|                             | n                        | $\beta$ [95% CI]     | $P_{\beta}$ | $R^2$  | n                          | $\beta$ [95% CI]     | $P_{\beta}$ | $R^2$  | n                                   | $\beta$ [95% CI]     | $P_{\beta}$ | $R^2$  | n                                  | $\beta$ [95% CI]     | $P_{\beta}$ | $R^2$  |
| <b>Beer</b>                 | 16,724                   | 1.38 [1.02; 1.74]    | 0.005       | 0.05   | 16,724                     | 1.34 [0.98; 1.70]    | 0.005       | 0.05   | 16,712                              | 1.35 [1.00; 1.70]    | 0.005       | 0.07   | 16,618                             | 1.37 [1.03; 1.71]    | 0.005       | 0.08   |
| <b>Liquor</b>               | 16,743                   | 1.38 [1.02; 1.81]    | 0.005       | 0.03   | 16,724                     | 1.32 [0.94; 1.70]    | 0.005       | 0.03   | 16,712                              | 1.32 [0.94; 1.70]    | 0.005       | 0.03   | 16,637                             | 1.37 [1.03; 1.71]    | 0.005       | 0.03   |
| <b>Wine</b>                 | 16,743                   | 1.07 [0.34; 1.80]    | 0.005       | 0.05   | 16,742                     | 1.04 [0.27; 1.80]    | 0.01        | 0.17%  | 16,741                              | 0.99 [0.21; 1.77]    | 0.01        | 0.16%  | 16,636                             | 1.11 [0.39; 1.84]    | 0.005       | 0.06   |
| <b>Citrus Juice</b>         | 16,743                   | 0.12 [-0.09; 0.34]   | 0.27        | 0.02%  | 16,743                     | 0.10 [-0.12; 0.31]   | 0.37        | 0.01%  | 16,743                              | 0.08 [-0.14; 0.29]   | 0.47        | 0.01%  | 16,640                             | 0.16 [-0.05; 0.38]   | 0.14        | 0.02%  |
| <b>Non-Citrus Juice</b>     | 16,752                   | 0.00 [-0.40; 0.40]   | 1.00        | 0.00%  | 16,752                     | -0.04 [-0.45; 0.37]  | 0.85        | <0.01% | 16,753                              | -0.01 [-0.34; 0.34]  | 0.66        | <0.01% | 16,652                             | 0.07 [-0.44; 0.29]   | 0.70        | <0.01% |
| <b>Coffee</b>               | 16,726                   | 0.11 [-0.11; 0.33]   | 0.32        | <0.01% | 16,726                     | 0.10 [-0.11; 0.30]   | 0.37        | <0.01% | 16,727                              | 0.10 [-0.11; 0.31]   | 0.35        | <0.01% | 16,621                             | 0.13 [-0.10; 0.35]   | 0.28        | <0.01% |
| <b>Tea</b>                  | 16,750                   | 0.02 [0.01; 0.04]    | 0.04        | 0.07%  | 16,750                     | 0.02 [0.01; 0.04]    | 0.04        | 0.07%  | 16,750                              | 0.02 [0.01; 0.04]    | 0.04        | 0.07%  | 16,598                             | 0.02 [0.01; 0.04]    | 0.04        | 0.07%  |
| <b>Diet Soda Drink</b>      | 16,750                   | -0.07 [-0.21; 0.07]  | 0.33        | 0.01%  | 16,750                     | -0.05 [-0.20; 0.09]  | 0.45        | <0.01% | 16,750                              | -0.07 [-0.21; 0.07]  | 0.33        | <0.01% | 16,645                             | -0.05 [-0.19; 0.09]  | 0.52        | <0.01% |
| <b>Soft Drink</b>           | 16,745                   | 0.68 [0.34; 1.02]    | 0.005       | 0.22%  | 16,745                     | 0.61 [0.31; 0.91]    | 0.005       | 0.22%  | 16,745                              | 0.53 [0.18; 0.87]    | 0.005       | 0.22%  | 16,652                             | 0.58 [0.26; 0.91]    | 0.005       | 0.22%  |
| <b>Butter</b>               | 16,731                   | -0.02 [-0.19; 0.15]  | 0.81        | <0.01% | 16,731                     | -0.08 [-0.26; 0.10]  | 0.36        | 0.01%  | 16,731                              | -0.05 [-0.23; 0.12]  | 0.54        | <0.01% | 16,652                             | -0.26 [-0.45; -0.06] | 0.01        | 0.05%  |
| <b>Cheese</b>               | 16,755                   | -0.02 [-0.09; -0.35] | 0.099%      | 0.29   | 16,755                     | -0.06 [-0.16; 0.04]  | 0.36        | 0.01%  | 16,754                              | -0.06 [-0.16; 0.04]  | 0.36        | 0.01%  | 16,648                             | -0.61 [-0.88; -0.34] | 0.005       | 0.87   |
| <b>**Cream</b>              | 6,238                    | 0.16 [-0.11; 0.43]   | 0.24        | 0.02%  | 6,238                      | 0.12 [-0.16; 0.39]   | 0.42        | <0.01% | 6,233                               | 0.11 [-0.17; 0.38]   | 0.45        | 0.01%  | 6,153                              | 0.17 [-0.10; 0.44]   | 0.22        | 0.02%  |
| <b>Ice Cream</b>            | 16,696                   | 0.32 [-0.04; 1.01]   | 0.42        | <0.01% | 16,696                     | 0.31 [-0.58; 0.81]   | 0.70        | <0.01% | 16,697                              | 0.22 [-0.50; 0.93]   | 0.55        | <0.01% | 16,593                             | 0.29 [-0.46; 1.05]   | 0.44        | <0.01% |
| <b>**Flavored Milk</b>      | 8,463                    | -0.20 [-1.06; 0.67]  | 0.66        | <0.01% | 8,463                      | -0.12 [-1.02; 0.61]  | 0.56        | <0.01% | 8,461                               | -0.18 [-1.04; 0.68]  | 0.68        | <0.01% | 8,408                              | -0.14 [-1.01; 0.72]  | 0.75        | <0.01% |
| <b>Skim Milk</b>            | 16,714                   | -0.63 [-0.78; -0.48] | 0.005       | 0.40%  | 16,713                     | -0.65 [-0.80; -0.50] | 0.005       | 0.43%  | 16,714                              | -0.61 [-0.76; -0.46] | 0.005       | 0.43%  | 16,609                             | -0.59 [-0.74; -0.44] | 0.005       | 0.43%  |
| <b>Whole Milk</b>           | 16,661                   | -0.20 [-0.45; 0.06]  | 0.14        | 0.01%  | 16,660                     | -0.30 [-0.56; -0.04] | 0.02        | 0.03%  | 16,661                              | -0.34 [-0.60; -0.07] | 0.02        | 0.03%  | 16,556                             | -0.24 [-0.50; 0.02]  | 0.08        | 0.02%  |
| <b>Yogurt</b>               | 16,685                   | -0.29 [-0.86; 0.28]  | 0.32        | <0.01% | 16,685                     | -0.14 [-0.72; 0.43]  | 0.63        | <0.01% | 16,686                              | 0.33 [-0.26; 0.93]   | 0.27        | 0.01%  | 16,579                             | -0.12 [-0.98; 0.75]  | 0.79        | <0.01% |
| <b>Cake/Pie</b>             | 16,758                   | -0.26 [-0.48; -0.03] | 0.02        | 0.01%  | 16,758                     | -0.38 [-0.61; -0.15] | 0.12        | 0.04%  | 16,759                              | -0.33 [-0.56; -0.10] | 0.26        | 0.04%  | 16,652                             | -0.23 [-0.46; 0.00]  | 0.05        | 0.01%  |
| <b>*Candy</b>               | 12,512                   | -0.28 [-0.73; 0.17]  | 0.22        | 0.01%  | 12,512                     | -0.37 [-0.83; 0.08]  | 0.11        | 0.02%  | 12,496                              | -0.27 [-0.72; 0.19]  | 0.25        | 0.01%  | 12,482                             | -0.26 [-0.71; 0.20]  | 0.27        | 0.01%  |
| <b>Chocolate</b>            | 16,754                   | 0.46 [-0.33; 1.24]   | 0.26        | <0.01% | 16,753                     | 0.27 [-0.48; 1.03]   | 0.48        | <0.01% | 16,754                              | 0.38 [-0.37; 1.14]   | 0.32        | <0.01% | 16,646                             | 0.31 [-0.38; 0.99]   | 0.38        | <0.01% |
| <b>Muffins/Corn Bread</b>   | 16,755                   | -0.57 [-1.45; 0.31]  | 0.20        | 0.01%  | 16,755                     | -0.64 [-1.58; 0.31]  | 0.19        | 0.01%  | 16,756                              | -0.56 [-1.46; 0.34]  | 0.22        | 0.01%  | 16,649                             | -0.50 [-1.36; 0.37]  | 0.26        | 0.01%  |
| <b>Fish</b>                 | 16,756                   | 0.52 [0.01; 1.03]    | 0.04        | 0.03%  | 16,756                     | 0.40 [0.14; 1.54]    | 0.27        | 0.06%  | 16,757                              | 0.39 [0.12; 1.43]    | 0.27        | 0.06%  | 16,650                             | 0.69 [0.17; 1.21]    | 0.01        | 0.04%  |
| <b>Shellfish</b>            | 16,731                   | 3.66 [1.24; 6.08]    | 0.005       | 0.10%  | 16,731                     | 3.61 [1.41; 6.61]    | 0.01        | 0.10%  | 16,732                              | 3.80 [1.29; 6.33]    | 0.01        | 0.10%  | 16,627                             | 3.75 [1.21; 6.29]    | 0.01        | 0.04%  |
| <b>Citrus Fruit</b>         | 16,756                   | -0.20 [-0.55; 0.16]  | 0.27        | <0.01% | 16,755                     | 0.03 [-0.33; 0.40]   | 0.86        | <0.01% | 16,756                              | 0.18 [-0.19; 0.55]   | 0.35        | 0.01%  | 16,648                             | -0.13 [-0.48; 0.23]  | 0.49        | <0.01% |
| <b>Non-Citrus Fruit</b>     | 11,470                   | -0.28 [-0.43; -0.13] | 0.005       | 0.37   | 11,470                     | -0.14 [-0.31; 0.02]  | 0.21        | 0.01%  | 11,471                              | -0.22 [-0.37; 0.54]  | 0.95        | <0.01% | 11,472                             | -0.23 [-0.39; -0.08] | 2.70E-03    | 0.04%  |
| <b>**Apple/Pear</b>         | 11,447                   | -0.39 [-0.76; -0.01] | 0.04        | 0.06%  | 11,447                     | -0.31 [-0.61; 0.29]  | 0.59        | <0.01% | 11,448                              | -0.29 [-0.61; 0.09]  | 0.13        | 0.02%  | 11,063                             | -0.60 [-1.45; 0.24]  | 0.16        | 0.02%  |
| <b>**Berry</b>              | 11,556                   | -0.73 [-1.22; -0.24] | 0.005       | 0.89   | 11,556                     | -0.48 [-0.99; 0.03]  | 0.06        | 0.02%  | 11,557                              | -0.60 [-1.10; -0.10] | 0.02        | 0.04%  | 11,071                             | -0.64 [-1.44; -0.14] | 0.01        | 0.05%  |
| <b>**Melon</b>              | 1,159                    | -0.17 [-0.83; 0.49]  | 0.61        | <0.01% | 9,138                      | 0.26 [-0.43; 0.94]   | 0.47        | <0.01% | 9,139                               | -0.21 [-0.68; 0.66]  | 0.97        | <0.01% | 9,054                              | -0.17 [-0.84; 0.50]  | 0.62        | <0.01% |
| <b>*Peach</b>               | 15,398                   | -0.31 [-0.88; 0.26]  | 0.28        | <0.01% | 15,397                     | 0.01 [-0.57; 0.60]   | 0.96        | <0.01% | 15,398                              | 0.15 [-0.44; 0.73]   | 0.63        | <0.01% | 15,293                             | -0.23 [-0.81; 0.34]  | 0.43        | <0.01% |
| <b>Brown Bread</b>          | 16,710                   | -0.60 [-0.77; -0.42] | 0.005       | 0.86   | 16,710                     | -0.52 [-0.71; -0.33] | 0.005       | 0.86   | 16,711                              | -0.56 [-0.75; -0.38] | 0.005       | 0.86   | 16,607                             | -0.50 [-0.68; -0.31] | 1.10E-07    | 0.16%  |
| <b>White Bread</b>          | 16,749                   | 0.09 [-0.06; 0.24]   | 0.28        | 0.01%  | 16,749                     | -0.01 [-0.17; 0.15]  | 0.88        | <0.01% | 16,750                              | 0.06 [-0.10; 0.21]   | 0.49        | <0.01% | 16,652                             | -0.40 [-0.63; -0.18] | 2.80E-04    | 0.07%  |
| <b>Cold Cereal</b>          | 16,754                   | -0.72 [-0.97; -0.47] | 1.99E-08    | 0.62   | 16,753                     | -0.70 [-1.00; -0.50] | 0.005       | 0.62   | 16,754                              | -0.69 [-1.04; -0.43] | 0.005       | 0.62   | 16,644                             | -0.67 [-0.93; -0.42] | 2.21E-07    | 0.13%  |
| <b>*Cooked Cereal</b>       | 15,408                   | -0.80 [-2.15; 0.56]  | 0.25        | 0.02%  | 15,408                     | -0.52 [-1.90; 0.87]  | 0.46        | <0.01% | 15,389                              | -0.29 [-1.63; 1.05]  | 0.67        | <0.01% | 15,311                             | -0.78 [-2.21; 0.66]  | 0.29        | 0.01%  |
| <b>Pasta</b>                | 16,726                   | -0.21 [-0.87; 0.46]  | 0.54        | <0.01% | 16,726                     | -0.20 [-0.96; 0.47]  | 0.57        | <0.01% | 16,707                              | -0.10 [-0.78; 0.56]  | 0.75        | <0.01% | 16,652                             | -0.22 [-0.88; 0.45]  | 0.52        | <0.01% |
| <b>*Rice</b>                | 15,411                   | 0.12 [-0.88; 0.83]   | 0.73        | 0.01%  | 15,411                     | 0.39 [-0.38; 1.10]   | 0.29        | 0.02%  | 15,412                              | 0.57 [-0.15; 1.28]   | 0.12        | 0.03%  | 15,371                             | 0.29 [-0.42; 1.01]   | 0.51        | 0.01%  |
| <b>Legumes</b>              | 16,724                   | 1.39 [0.29; 2.50]    | 0.01        | 0.09%  | 16,724                     | 1.37 [0.97; 2.46]    | 0.005       | 0.38   | 16,725                              | 1.45 [1.02; 2.20]    | 0.005       | 0.38   | 16,621                             | 1.07 [-0.18; 2.32]   | 0.01        | 0.06%  |
| <b>*Nuts</b>                | 10,558                   | -0.53 [-0.89; -0.16] | 4.37E-03    | 0.08%  | 10,558                     | -0.47 [-0.84; -0.10] | 1.99E-02    | 0.06%  | 10,559                              | -0.46 [-0.83; -0.08] | 0.02        | 0.04%  | 10,518                             | -0.47 [-0.83; -0.10] | 0.01        | 0.07%  |
| <b>*Seanuts</b>             | 12,504                   | -0.88 [-1.25; -0.51] | 4.00E-06    | 0.18%  | 12,504                     | -0.77 [-1.15; -0.39] | 7.28E-05    | 0.13%  | 12,492                              | -0.65 [-1.03; -0.26] | 1.03E-03    | 0.09%  | 12,478                             | -0.78 [-1.16; -0.40] | 6.87E-05    | 0.13%  |
| <b>*Bacon</b>               | 12,500                   | -0.07 [-0.80; 0.66]  | 0.85        | <0.01% | 12,500                     | -0.23 [-1.42; 0.96]  | 0.71        | 0.05%  | 12,483                              | -0.69 [-2.04; 0.66]  | 0.31        | 0.03%  | 12,479                             | -0.22 [-0.96; 0.51]  | 0.56        | 0.01%  |
| <b>Beef/Pork/Lamb</b>       | 16,757                   | 0.63 [0.32; 0.95]    | 7.68E-06    | 0.08%  | 16,757                     | 0.56 [0.24; 0.88]    | 5.40E-04    | 0.05%  | 16,738                              | 0.27 [-0.32; 0.86]   | 0.38        | 0.02%  | 16,717                             | 0.48 [-0.04; 1.00]   | 0.07        | 0.06%  |
| <b>**Hamburger</b>          | 11,065                   | 0.97 [-0.06; 2.00]   | 0.06        | 0.02%  | 11,065                     | 0.66 [-0.38; 1.69]   | 0.21        | 0.01%  | 11,049                              | 0.13 [-0.93; 1.19]   | 0.81        | <0.01% | 11,035                             | 0.70 [-0.34; 1.74]   | 0.18        | 0.01%  |
| <b>**Hotdog</b>             | 11,165                   | 0.18 [-1.21; 1.58]   | 0.80        | <0.01% | 11,165                     | -0.06 [-1.46; 1.34]  | 0.93        | <0.01% | 11,149                              | -0.36 [-1.44; 0.68]  | 0.48        | 0.01%  | 11,132                             | -0.65 [-1.71; 0.41]  | 0.23        | 0.02%  |
| <b>Organ Meats</b>          | 16,729                   | -2.21 [-5.61; 1.19]  | 0.20        | 0.01%  | 16,729                     | -2.09 [-5.48; 1.30]  | 0.23        | 0.01%  | 16,711                              | -2.40 [-5.80; 0.99]  | 0.17        | 0.01%  | 16,691                             | -2.37 [-5.77; 1.03]  | 0.17        | 0.01%  |
| <b>*Sausage/Lunch Meat</b>  | 12,513                   | 0.27 [-0.23; 0.76]   | 0.29        | 0.01%  | 12,513                     | 0.16 [-0.33; 0.65]   | 0.52        | <0.01% | 12,496                              | -0.10 [-0.61; 0.40]  | 0.69        | <0.01% | 12,482                             | 0.14 [-0.36; 0.64]   | 0.58        | <0.01% |
| <b>Poultry</b>              | 16,740                   | 0.70 [0.29; 1.10]    | 6.78E-04    | 0.08%  | 16,740                     | 1.00 [0.59; 1.42]    | 2.45E-06    | 0.15%  | 16,722                              | 0.91 [0.51; 1.32]    | 9.81E-06    | 0.13%  | 16,719                             | 0.62 [0.21; 1.02]    | 2.83E-03    | 0.07%  |
| <b>*Cabbage/Cauliflower</b> | 15,419                   | -0.01 [-0.69; 0.67]  | 0.98        | <0.01% | 15,419                     | -0.01 [-0.69; 1.34]  | 0.99        | 0.03%  | 15,402                              | 0.00 [-0.02; 0.23]   | 0.66        | 0.04%  | 15,381                             | 0.19 [-0.50; 0.83]   | 0.59        | 0.01%  |
| <b>*Broccoli</b>            | 15,390                   | -0.21 [-0.86; 0.44]  | 0.53        | <0.01% | 15,390                     | 0.34 [-0.34; 1.03]   | 0.32        | 0.01%  | 15,373                              | 0.49 [-0.18; 1.17]   | 0.15        | 0.02%  | 15,352                             | -0.05 [-0.71; 0.60]  | 0.88        | <0.01% |
| <b>*Carrot</b>              | 15,416                   | -0.64 [-1.52; 0.25]  | 0.16        | 0.02%  | 15,416                     | -0.77 [-1.55; 0.41]  | 0.78        | <0.01% | 15,399                              | -0.48 [-1.43; 0.47]  | 0.92        | <0.01% | 15,380                             | -0.48 [-1.36; 0.41]  | 0.23        | 0.01%  |
| <b>**Corn</b>               | 11,162                   | -0.71 [-1.77; 0.34]  | 0.19        | 0.02%  | 11,162                     | -0.36 [-1.42; 0.71]  | 0.51        | 0.01%  | 11,146                              | -0.38 [-1.44; 0.68]  | 0.48        | 0.01%  | 11,132                             | -0.65 [-1.71; 0.41]  | 0.28        | 0.02%  |
| <b>**Lettuce</b>            | 9,155                    | 0.01 [-0.39; 0.41]   | 0.97        | <0.01% | 9,154                      | 0.26 [-1.16; 0.68]   | 0.41        | 0.02%  | 9,149                               | 0.32 [-0.10; 0.73]   | 0.13        | 0.02%  | 9,120                              | 0.08 [-0.33; 0.42]   | 0.95        | <0.01% |
| <b>**Peas</b>               | 11,160                   | -0.50 [-1.49; 0.49]  | 0.32        | 0.01%  | 11,160                     | -0.27 [-1.08; 0.94]  | 0.89        | <0.01% | 11,145                              | -0.08 [-0.93; 0.83]  | 0.88        | <0.01% | 11,131                             | -0.38 [-1.37; 0.62]  | 0.46        |        |

Table S6. Diet-wide association study results for the original and diet quality score adjusted analyses in the male-only cohort.

| Food Item              | No Diet Score Adjustment |                      |                | Health-Eating Diet Score Adjustment |                      |                | DASH Diet Score Adjustment |                      |                | Mediterranean Diet Score Adjustment |                      |                | Data-Derived Diet Score Adjustment |                      |                |        |
|------------------------|--------------------------|----------------------|----------------|-------------------------------------|----------------------|----------------|----------------------------|----------------------|----------------|-------------------------------------|----------------------|----------------|------------------------------------|----------------------|----------------|--------|
|                        | n                        | P <sub>β</sub>       | R <sup>2</sup> | n                                   | P <sub>β</sub>       | R <sup>2</sup> | n                          | P <sub>β</sub>       | R <sup>2</sup> | n                                   | P <sub>β</sub>       | R <sup>2</sup> | n                                  | P <sub>β</sub>       | R <sup>2</sup> |        |
| <b>Alcohol</b>         |                          |                      |                |                                     |                      |                |                            |                      |                |                                     |                      |                |                                    |                      |                |        |
| Bever                  | 8,392                    | 1.33 [0.93, 1.74]    | 1.24E-10       | 8,387                               | 1.24 [0.99, 1.47]    | 2.44E-23       | 8,379                      | 1.24 [0.99, 1.47]    | 2.44E-23       | 8,379                               | 1.24 [0.99, 1.47]    | 2.44E-23       | 8,333                              | 1.33 [0.93, 1.74]    | 1.18E-10       | 1.31%  |
| Liquor                 | 8,403                    | 1.16 [0.46, 1.86]    | 1.56E-03       | 8,401                               | 1.09 [0.41, 1.77]    | 1.56E-03       | 8,399                      | 1.10 [0.44, 1.74]    | 6.29E-04       | 8,396                               | 1.09 [0.44, 1.74]    | 7.00E-03       | 8,345                              | 1.15 [0.48, 1.83]    | 7.57E-04       | 0.41%  |
| Wine                   | 8,402                    | 1.30 [0.64, 1.96]    | 1.13E-04       | 8,401                               | 1.34 [0.68, 2.01]    | 6.58E-05       | 8,397                      | 1.46 [0.80, 2.12]    | 1.42E-05       | 8,387                               | 1.30 [0.64, 1.96]    | 1.20E-04       | 8,343                              | 1.36 [0.69, 2.03]    | 7.25E-05       | 0.18%  |
| <b>Alcohol</b>         |                          |                      |                |                                     |                      |                |                            |                      |                |                                     |                      |                |                                    |                      |                |        |
| Citrus Juice           | 8,407                    | 0.10 [-0.19, 0.40]   | 0.50           | 8,407                               | 0.08 [-0.21, 0.38]   | 0.58           | 8,403                      | 0.09 [-0.21, 0.38]   | 0.57           | 8,406                               | 0.16 [-0.14, 0.46]   | 0.30           | 8,349                              | 0.15 [-0.15, 0.44]   | 0.34           | 0.01%  |
| Non-Citrus Juice       | 8,411                    | 0.16 [-0.17, 0.50]   | 0.33           | 8,411                               | 0.13 [-0.20, 0.46]   | 0.44           | 8,407                      | 0.12 [-0.21, 0.45]   | 0.47           | 8,406                               | 0.19 [-0.14, 0.32]   | 0.26           | 8,354                              | 0.05 [-0.29, 0.38]   | 0.79           | <0.01% |
| Coffee                 | 8,398                    | 0.07 [-0.14, 0.27]   | 0.52           | 8,398                               | 0.05 [-0.14, 0.23]   | 0.65           | 8,404                      | 0.06 [-0.14, 0.25]   | 0.58           | 8,378                               | 0.05 [-0.15, 0.25]   | 0.60           | 8,341                              | 0.09 [-0.14, 0.33]   | 0.44           | <0.01% |
| Tea                    | 8,385                    | 0.22 [-0.02, 0.42]   | 0.04           | 8,385                               | 0.22 [-0.02, 0.42]   | 0.04           | 8,386                      | 0.22 [-0.02, 0.42]   | 0.04           | 8,386                               | 0.22 [-0.02, 0.42]   | 0.04           | 8,328                              | 0.21 [0.01, 0.41]    | 0.04           | 0.06%  |
| Diet Soft Drink        | 8,406                    | -0.29 [-0.53, -0.06] | 0.01           | 8,406                               | -0.27 [-0.50, -0.03] | 0.03           | 8,402                      | -0.27 [-0.50, -0.03] | 0.03           | 8,385                               | -0.29 [-0.52, -0.06] | 0.02           | 8,348                              | -0.27 [-0.50, -0.03] | 0.03           | 0.05%  |
| Soft Drink             | 8,404                    | -0.79 [-0.53, -1.04] | 1.38E-09       | 8,404                               | -0.69 [-0.48, -0.96] | 2.36E-07       | 8,400                      | -0.58 [-0.33, -1.03] | 0.01           | 8,383                               | -0.69 [-0.27, -1.11] | 0.70E-03       | 8,354                              | -0.69 [-0.26, -1.18] | 0.01           | 0.29%  |
| <b>Dairy Products</b>  |                          |                      |                |                                     |                      |                |                            |                      |                |                                     |                      |                |                                    |                      |                |        |
| Butter                 | 8,397                    | -0.03 [-0.29, 0.22]  | 0.80           | 8,397                               | -0.11 [-0.37, 0.16]  | 0.43           | 8,394                      | -0.07 [-0.33, 0.19]  | 0.59           | 8,378                               | -0.05 [-0.30, 0.21]  | 0.70E-03       | 8,354                              | -0.24 [-0.52, 0.04]  | 0.09           | 0.06%  |
| Cheese                 | 8,410                    | -0.64 [-1.05, -0.23] | 2.39E-03       | 8,410                               | -0.68 [-1.09, -0.27] | 1.22E-03       | 8,406                      | -0.65 [-1.04, -0.22] | 2.59E-03       | 8,389                               | -0.74 [-1.16, -0.32] | 4.80E-04       | 8,351                              | -0.65 [-1.07, -0.24] | 2.07E-03       | 0.10%  |
| *Cream                 | 2,816                    | 0.35 [-0.13, 0.80]   | 0.16           | 2,816                               | 0.29 [-0.29, 0.65]   | 0.47           | 2,814                      | 0.22 [-0.21, 0.72]   | 0.28           | 2,803                               | 0.25 [-0.22, 0.71]   | 0.26           | 2,770                              | 0.36 [-0.11, 0.83]   | 0.13           | 0.06%  |
| Ice Cream              | 8,379                    | -0.05 [-0.55, 0.45]  | 0.84           | 8,379                               | -0.15 [-0.65, 0.36]  | 0.57           | 8,375                      | -0.09 [-0.59, 0.41]  | 0.73           | 8,338                               | -0.10 [-0.61, 0.40]  | 0.69           | 8,321                              | -0.06 [-0.56, 0.44]  | 0.81           | <0.01% |
| *Skimmed Milk          | 4,069                    | 0.19 [-1.34, 1.71]   | 0.81           | 4,069                               | 0.11 [-1.49, 1.56]   | 0.91           | 4,068                      | 0.23 [-1.29, 1.75]   | 0.27           | 4,055                               | 0.16 [-1.36, 1.69]   | 0.84           | 4,038                              | 0.22 [-1.31, 1.75]   | 0.78           | <0.01% |
| *Whole Milk            | 8,390                    | -0.78 [-1.00, -0.56] | 3.54E-12       | 8,389                               | -0.80 [-1.02, -0.58] | 7.10E-13       | 8,385                      | -0.66 [-0.89, -0.43] | 2.16E-08       | 8,369                               | -0.75 [-0.97, -0.53] | 2.90E-11       | 8,331                              | -0.75 [-0.97, -0.52] | 8.13E-11       | 0.51%  |
| Whole Milk             | 8,369                    | -0.27 [-0.62, 0.08]  | 0.12           | 8,368                               | -0.38 [-0.74, -0.03] | 0.03           | 8,368                      | -0.38 [-0.74, -0.03] | 0.03           | 8,347                               | -0.35 [-0.70, 0.00]  | 0.05           | 8,311                              | -0.32 [-0.67, 0.04]  | 0.08           | 0.04%  |
| Yogurt                 | 8,375                    | -0.77 [-1.21, -0.28] | 0.16           | 8,375                               | -0.43 [-1.43, 0.57]  | 0.40           | 8,374                      | -0.14 [-0.89, 1.71]  | 0.80           | 8,354                               | -0.42 [-1.43, 0.58]  | 0.41           | 8,311                              | -0.52 [-1.53, 0.49]  | 0.31           | 0.01%  |
| <b>Desserts/Sweets</b> |                          |                      |                |                                     |                      |                |                            |                      |                |                                     |                      |                |                                    |                      |                |        |
| Cake/Pie               | 8,413                    | -0.17 [-0.48, 0.14]  | 0.29           | 8,413                               | -0.29 [-0.61, 0.02]  | 0.07           | 8,409                      | -0.23 [-0.54, 0.08]  | 0.15           | 8,392                               | -0.18 [-0.49, 0.13]  | 0.24           | 8,354                              | -0.16 [-0.48, 0.16]  | 0.33           | <0.01% |
| *Candy                 | 6,281                    | -0.30 [-0.96, 0.35]  | 0.36           | 6,281                               | -0.37 [-1.02, 0.29]  | 0.27           | 6,282                      | -0.23 [-0.89, 0.43]  | 0.49           | 6,264                               | -0.24 [-0.90, 0.42]  | 0.48           | 6,233                              | -0.31 [-0.97, 0.35]  | 0.36           | 0.02%  |
| Chocolate              | 8,412                    | 0.63 [0.01, 1.25]    | 0.05           | 8,411                               | 0.46 [-0.16, 1.09]   | 0.15           | 8,407                      | 0.54 [-0.16, 1.16]   | 0.09           | 8,390                               | 0.59 [0.04, 1.21]    | 0.06           | 8,352                              | 0.55 [-0.07, 1.18]   | 0.08           | 0.04%  |
| Muffins/Corn Bread     | 8,410                    | -0.04 [-0.75, 0.67]  | 0.91           | 8,410                               | -0.11 [-0.82, 0.60]  | 0.76           | 8,407                      | -0.10 [-0.81, 0.61]  | 0.79           | 8,407                               | -0.10 [-0.81, 0.61]  | 0.79           | 8,352                              | 0.05 [-0.66, 0.77]   | 0.88           | <0.01% |
| <b>Fish</b>            |                          |                      |                |                                     |                      |                |                            |                      |                |                                     |                      |                |                                    |                      |                |        |
| Fish                   | 8,412                    | 0.60 [-0.18, 1.38]   | 0.13           | 8,412                               | 1.17 [0.36, 1.98]    | 4.71E-03       | 8,409                      | 1.06 [0.27, 1.85]    | 0.01           | 8,392                               | 1.25 [0.42, 2.08]    | 3.21E-03       | 8,354                              | 0.75 [-0.04, 1.54]   | 0.06           | 0.04%  |
| Shellfish              | 8,401                    | 0.47 [1.05, 7.10]    | 0.01           | 8,401                               | 0.63 [1.33, 7.96]    | 0.01           | 8,401                      | 0.63 [1.33, 7.96]    | 0.01           | 8,381                               | 0.41 [1.21, 2.68]    | 0.01           | 8,344                              | 0.47 [0.99, 7.15]    | 0.01           | 0.12%  |
| <b>Fruit</b>           |                          |                      |                |                                     |                      |                |                            |                      |                |                                     |                      |                |                                    |                      |                |        |
| Citrus Fruit           | 8,412                    | -0.09 [-0.64, 0.46]  | 0.75           | 8,411                               | 0.19 [-0.37, 0.76]   | 0.50           | 8,407                      | 0.22 [-0.22, 0.92]   | 0.23           | 8,390                               | 0.09 [-0.47, 0.65]   | 0.75           | 8,352                              | -0.04 [-0.59, 0.52]  | 0.90           | <0.01% |
| Non-Citrus Fruit       | 8,414                    | -0.44 [-0.66, -0.19] | 3.44E-04       | 8,413                               | -0.26 [-0.59, 0.07]  | 0.05           | 8,409                      | -0.13 [-0.39, 0.14]  | 0.36           | 8,392                               | -0.32 [-0.57, -0.07] | 0.01           | 8,354                              | -0.45 [-0.85, -0.05] | 0.03           | 0.11%  |
| *Apple/Pear            | 5,663                    | -0.58 [-1.13, -0.03] | 0.04           | 5,663                               | -0.29 [-0.89, 0.30]  | 0.33           | 5,661                      | -0.13 [-0.72, 0.47]  | 0.68           | 5,648                               | -0.42 [-0.98, 0.14]  | 0.15           | 5,619                              | -0.97 [-2.19, 0.25]  | 0.12           | 0.06%  |
| *Banana                | 6,271                    | -0.93 [-1.66, -0.20] | 0.01           | 6,271                               | -0.59 [-1.35, 0.18]  | 0.13           | 6,269                      | -0.34 [-1.11, 0.43]  | 0.39           | 6,266                               | -0.66 [-1.41, 0.69]  | 0.08           | 6,262                              | -0.87 [-1.62, -0.13] | 0.02           | 0.09%  |
| *Melon                 | 4,352                    | 0.04 [-1.24, 1.31]   | 0.95           | 4,351                               | 0.17 [-0.61, 2.01]   | 0.29           | 4,349                      | 0.76 [0.56, 2.08]    | 0.08           | 4,332                               | 0.35 [0.95, 1.61]    | 0.60           | 4,295                              | -0.02 [-1.31, 1.26]  | 0.97           | <0.01% |
| *Peach                 | 7,796                    | -0.43 [-2.07, 1.20]  | 0.60           | 7,795                               | 0.08 [-1.74, 1.87]   | 0.95           | 7,791                      | 0.35 [-1.62, 2.32]   | 0.73           | 7,787                               | -0.08 [-1.91, 1.24]  | 0.93           | 7,739                              | -0.39 [-1.91, 1.13]  | 0.61           | 0.01%  |
| <b>Brown Bread</b>     |                          |                      |                |                                     |                      |                |                            |                      |                |                                     |                      |                |                                    |                      |                |        |
| White Bread            | 8,382                    | -0.68 [-0.93, -0.44] | 6.47E-08       | 8,382                               | -0.61 [-0.88, -0.34] | 8.26E-06       | 8,379                      | -0.52 [-0.89, -0.36] | 3.09E-06       | 8,362                               | -0.62 [-0.89, -0.36] | 3.09E-06       | 8,327                              | -0.60 [-0.85, -0.34] | 5.83E-06       | 0.25%  |
| Cold Cereal            | 8,408                    | 0.02 [-0.19, 0.23]   | 0.85           | 8,408                               | -0.10 [-0.32, 0.12]  | 0.03           | 8,405                      | -0.11 [-0.33, 0.11]  | 0.31           | 8,388                               | -0.03 [-0.25, 0.18]  | 0.75           | 8,354                              | -0.36 [-0.86, -0.26] | 1.02E-04       | 0.14%  |
| *Cooked Cereal         | 8,409                    | -0.73 [-1.07, -0.38] | 3.41E-05       | 8,409                               | -0.73 [-1.08, -0.39] | 2.78E-05       | 8,405                      | -0.58 [-0.93, -0.23] | 1.72E-03       | 8,388                               | -0.67 [-1.02, -0.33] | 1.50E-04       | 8,350                              | -0.69 [-1.04, -0.34] | 2.02E-04       | 0.17%  |
| Pasta                  | 7,807                    | -0.17 [-2.52, 0.17]  | 0.79           | 7,807                               | -0.70 [-1.54, 0.14]  | 0.01           | 7,803                      | -0.56 [-1.40, 0.29]  | 0.20           | 7,787                               | -0.78 [-1.62, 0.07]  | 0.07           | 7,753                              | -1.22 [-2.63, 0.19]  | 0.09           | 0.06%  |
| *Rice                  | 8,397                    | -0.17 [-1.15, 0.80]  | 0.39           | 8,397                               | -0.15 [-1.13, 0.83]  | 0.77           | 8,395                      | -0.11 [-0.97, 0.99]  | 0.98           | 8,376                               | -0.08 [-1.06, 0.91]  | 0.88           | 8,354                              | -0.16 [-1.14, 0.82]  | 0.75           | <0.01% |
| <b>Legumes/Beans</b>   |                          |                      |                |                                     |                      |                |                            |                      |                |                                     |                      |                |                                    |                      |                |        |
| *Beans                 | 7,808                    | -0.08 [-1.81, 1.65]  | 0.93           | 7,808                               | -0.38 [-0.69, 1.45]  | 0.49           | 7,804                      | 0.55 [-0.52, 1.62]   | 0.31           | 7,787                               | 0.30 [-0.77, 1.38]   | 0.58           | 7,751                              | 0.00 [-1.88, 1.87]   | 1.00           | <0.01% |
| <b>Legumes/Beans</b>   |                          |                      |                |                                     |                      |                |                            |                      |                |                                     |                      |                |                                    |                      |                |        |
| *Cabbage Cauliflower   | 7,810                    | -0.49 [-1.55, 0.57]  | 0.37           | 7,810                               | -0.27 [-1.24, 3.50]  | 3.09E-05       | 7,807                      | 0.30 [-0.80, 1.40]   | 0.60           | 7,790                               | 0.22 [-1.29, 0.83]   | 0.71           | 7,752                              | -0.32 [-1.39, 0.75]  | 0.56           | <0.01% |
| *Broccoli              | 7,796                    | -0.54 [-1.68, 0.59]  | 0.35           | 7,796                               | 0.31 [-0.89, 1.51]   | 0.61           | 7,793                      | 0.47 [-0.72, 1.66]   | 0.44           | 7,776                               | -0.22 [-1.37, 0.93]  | 0.71           | 7,740                              | -0.32 [-1.47, 0.83]  | 0.59           | <0.01% |
| *Carrot                | 7,809                    | -0.85 [-2.13, 0.44]  | 0.20           | 7,809                               | -0.63 [-2.54, 1.05]  | 0.14           | 7,806                      | -0.12 [-1.48, 1.24]  | 0.86           | 7,790                               | -0.62 [-2.01, 0.77]  | 0.38           | 7,753                              | -0.92 [-2.40, 0.57]  | 0.23           | 0.02%  |
| *Corn                  | 5,677                    | 0.70 [-0.62, 2.02]   | 0.30           | 5,677                               | 0.18 [-0.94, 1.73]   | 0.57           | 5,675                      | -0.56 [-2.18, 0.98]  | 0.43           | 5,661                               | -0.93 [-2.45, 0.60]  | 0.23           | 5,631                              | -1.02 [-2.55, 0.51]  | 0.19           | 0.04%  |
| *Lettuce               | 4,353                    | 0.18 [-0.56, 0.93]   | 0.63           | 4,352                               | 0.07 [0.88, 1.65]    | 0.17           | 4,350                      | 0.20 [1.01, 1.74]    | 0.04           | 4,334                               | 0.35 [0.40, 0.30]    | 0.37           | 4,297                              | 0.16 [-0.60, 0.92]   | 0.69           | 0.01%  |
| *Peas                  | 5,668                    | -0.83 [-2.29, 0.63]  | 0.26           | 5,668                               | -0.25 [-1.55, 1.24]  | 0.74           | 5,666                      | -0.24 [-1.51, 1.24]  | 0.75           | 5,652                               | -0.62 [-2.08, 0.84]  | 0.41           | 5,622                              | -0.67 [-2.14, 0.79]  | 0.37           | 0.02%  |
| Potato                 | 8,411                    | 0.90 [0.25, 1.56]    | 0.01           | 8,411                               | 0.78 [0.13, 1.44]    | 0.42           | 8,407                      | 0.74 [0.08, 1.39]    | 0.63           | 8,392                               | 1.08 [0.42, 1.75]    | 1.42E-03       | 8,352                              | 0.80 [0.14, 1.45]    | 0.02           | 0.07%  |
| Spinach                | 8,409                    | -0.11 [-0.95, 0.73]  | 0.79           | 8,409                               | -0.03 [-0.87, 1.19]  | 0.47           | 8,406                      | 0.50 [0.37, 1.37]    | 0.26           | 8,390                               | 0.22 [0.64, 1.09]    | 0.61           | 8,351                              | -0.20 [-1.63, 1.21]  | 0.78           | <0.01% |
| *String Beans          | 5,671                    | 0.15 [-0.91, 1.21]   | 0.79           | 5,671                               | 0.57 [-1.52, 1.66]   | 0.31           | 5,669                      | 0.60 [-0.48, 1.68]   | 0.28           | 5,655                               | 0.29 [0.78, 1.35]    | 0.60           | 5,626                              | -0.56 [-3.34, 1.62]  | 0.50           | <0.01% |
| Tomato                 | 8,405                    | 0.43 [-0.20, 1.05]   | 0.19           | 8,405                               | 0.70 [0.15, 1.43]    | 0.02           | 8,403                      | 0.85 [0.21, 1.49]    | 0.01           | 8,388                               | 0.55 [0.08, 1.10]    | 0.08           | 8,348                              | 0.32 [0.64, 1.29]    | 0.51           | 0.03%  |
| Winter Squash          | 8,410                    | -0.75 [-2.87, 1.36]  | 0.48           | 8,410                               | -0.14 [-1.99, 1.72]  | 0.89           | 8,407                      | 0.25 [-2.13, 1.81]   | 0.63           | 8,391                               | -0.34 [-2.13, 1.48]  | 0.72           | 8,353                              | -0.71 [-2.81, 1.39]  | 0.31           | 0.01%  |
| <b>*Creamer</b>        |                          |                      |                |                                     |                      |                |                            |                      |                |                                     |                      |                |                                    |                      |                |        |
| Margarine              | 2,780                    | 0.41 [-0.20, 1.03]   | 0.18           | 2,780                               | 0.36 [-0.25, 0.98]   | 0.24           | 2,778                      | 0.39 [-0.22, 1.00]   | 0.22           | 2,764                               | 0.                   |                |                                    |                      |                |        |



Table S7. Diet-wide association study results for the original and diet quality score adjusted analyses in the female-only cohort.

| Food Item                  | No Diet Score Adjustment |                      |                |                | DASH Diet Score Adjustment |                   |                      |                | Mediterranean Diet Score Adjustment |                   |            |                      | Data-Derived Diet Score Adjustment |                   |          |            |                      |                   |                |          |
|----------------------------|--------------------------|----------------------|----------------|----------------|----------------------------|-------------------|----------------------|----------------|-------------------------------------|-------------------|------------|----------------------|------------------------------------|-------------------|----------|------------|----------------------|-------------------|----------------|----------|
|                            | n                        | P <sub>q</sub>       | R <sup>2</sup> | P <sub>p</sub> | n                          | β [95% CI]        | P <sub>q</sub>       | R <sup>2</sup> | P <sub>p</sub>                      | n                 | β [95% CI] | P <sub>q</sub>       | R <sup>2</sup>                     | P <sub>p</sub>    | n        | β [95% CI] | P <sub>q</sub>       | R <sup>2</sup>    | P <sub>p</sub> |          |
| <b>Bever</b>               | 8,332                    | 1.78 [1.22; 2.34]    | 0.49%          | 0.69           | 8,332                      | 1.76 [1.20; 2.31] | 0.47%                | 0.72           | 8,316                               | 1.76 [1.20; 2.32] | 0.48%      | 0.64                 | 8,285                              | 1.67 [1.10; 2.24] | 0.43%    | 0.70       | 8,292                | 1.79 [1.16; 2.43] | 0.41%          | 0.58     |
| <b>Beer</b>                | 8,340                    | 1.84 [1.21; 2.48]    | 0.44%          | 0.61           | 8,340                      | 1.77 [1.13; 2.40] | 0.42%                | 0.65           | 8,323                               | 1.80 [1.16; 2.43] | 0.44%      | 0.58                 | 8,292                              | 1.79 [1.16; 2.43] | 0.41%    | 0.58       | 8,292                | 1.79 [1.16; 2.43] | 0.41%          | 0.58     |
| <b>Wine</b>                | 8,341                    | 0.89 [0.17; 1.94]    | 0.10           | 0.20%          | 0.02                       | 8,341             | 0.86 [-0.19; 1.92]   | 0.11           | 0.20%                               | 0.02              | 8,324      | 0.84 [-0.25; 1.93]   | 0.13                               | 0.19%             | 0.02     | 8,293      | 0.93 [-0.12; 1.98]   | 0.08              | 0.21%          | 0.02     |
| <b>Citrus Juice</b>        | 8,336                    | 0.16 [0.15; 0.48]    | 0.01           | 0.02%          | 0.97                       | 8,336             | 0.15 [-0.17; 0.46]   | 0.36           | 0.02%                               | 0.95              | 8,331      | 0.10 [-0.22; 0.42]   | 0.54                               | 0.02%             | 0.84     | 8,291      | 0.21 [-0.11; 0.51]   | 0.20              | 0.03%          | 0.99     |
| <b>Non-Citrus Juice</b>    | 8,341                    | -0.02 [-0.35; 0.31]  | 0.91           | <0.01%         | 0.16                       | 8,341             | -0.02 [-0.36; 0.32]  | 0.91           | <0.01%                              | 0.15              | 8,326      | -0.01 [-0.35; 0.32]  | 0.94                               | <0.01%            | 0.16     | 8,298      | -0.17 [-0.68; 0.34]  | 0.52              | <0.01%         | 0.09     |
| <b>Coffee</b>              | 8,328                    | 0.06 [-0.18; 0.31]   | 0.61           | 0.01%          | 4.08E-03                   | 8,328             | 0.05 [-0.19; 0.30]   | 0.66           | 0.01%                               | 5.1E-03           | 8,309      | 0.00 [-0.35; 0.32]   | 0.93                               | <0.01%            | 0.03     | 8,280      | 0.06 [-0.19; 0.32]   | 0.62              | 0.01%          | 3.7E-03  |
| <b>Tea</b>                 | 8,337                    | 0.27 [-0.05; 0.59]   | 0.09           | 0.09%          | 0.03                       | 8,337             | 0.27 [-0.04; 0.58]   | 0.09           | 0.09%                               | 0.03              | 8,329      | 0.26 [-0.05; 0.58]   | 0.10                               | 0.08%             | 0.03     | 8,270      | 0.26 [-0.04; 0.56]   | 0.09              | 0.08%          | 0.04     |
| <b>Diet Soft Drink</b>     | 8,344                    | 0.07 [-0.10; 0.24]   | 0.41           | <0.01%         | 0.89                       | 8,344             | 0.07 [-0.10; 0.24]   | 0.42           | <0.01%                              | 0.91              | 8,325      | 0.00 [-0.35; 0.32]   | 0.94                               | <0.01%            | 0.03     | 8,297      | 0.09 [-0.08; 0.26]   | 0.31              | 0.01%          | 0.94     |
| <b>Soft Drink</b>          | 8,341                    | 0.55 [-0.09; 1.01]   | 0.02           | 0.16%          | 0.04                       | 8,341             | 0.53 [-0.27; 0.80]   | 0.09           | 0.13%                               | 0.20              | 8,322      | 0.54 [-0.10; 0.97]   | 0.07                               | 0.15%             | 0.07     | 8,298      | 0.43 [-0.12; 0.24]   | 0.07              | 0.06%          | 0.45     |
| <b>Butter</b>              | 8,334                    | 0.01 [-0.23; 0.24]   | 0.96           | <0.01%         | 0.49                       | 8,334             | -0.01 [-0.27; 0.22]  | 0.86           | <0.01%                              | 0.87              | 8,320      | -0.01 [-0.25; 0.21]  | 0.91                               | <0.01%            | 0.72     | 8,298      | -0.26 [-0.57; 0.00]  | 0.05              | 0.04%          | 0.99     |
| <b>Cheese</b>              | 8,345                    | -0.64 [-0.99; -0.29] | 3.10E-04       | 0.09%          | 0.84                       | 8,345             | -0.66 [-1.01; -0.31] | 2.13E-04       | 0.09%                               | 0.86              | 8,330      | -0.62 [-0.97; -0.27] | 4.96E-04                           | 0.08%             | 0.88     | 8,297      | -0.46 [-0.93; 0.00]  | 0.05              | 0.08%          | 0.94     |
| <b>*Ice Cream</b>          | 3,422                    | 0.03 [-0.29; 0.35]   | 0.84           | <0.01%         | 0.91                       | 3,422             | 0.01 [-0.25; 0.43]   | 0.56           | <0.01%                              | 0.93              | 3,419      | 0.03 [-0.29; 0.35]   | 0.85                               | <0.01%            | 0.93     | 3,383      | 0.05 [-0.28; 0.37]   | 0.78              | <0.01%         | 0.93     |
| <b>Ice Cream</b>           | 8,317                    | 0.45 [-0.20; 1.09]   | 0.17           | 0.05%          | 0.10                       | 8,317             | 0.33 [-0.32; 0.98]   | 0.32           | 0.04%                               | 0.30              | 8,302      | 0.40 [-0.26; 1.06]   | 0.23                               | 0.05%             | 0.24     | 8,272      | 0.43 [-0.21; 1.08]   | 0.19              | 0.05%          | 0.11     |
| <b>**Flavored Milk</b>     | 4,394                    | -0.41 [-1.41; 0.60]  | 0.43           | 0.01%          | 0.37                       | 4,394             | -0.41 [-1.41; 0.58]  | 0.40           | 0.01%                               | 0.35              | 4,393      | -0.43 [-1.46; 0.56]  | 0.41                               | 0.01%             | 0.36     | 4,383      | -0.45 [-1.46; 0.56]  | 0.40              | 0.01%          | 0.29     |
| <b>Skim Milk</b>           | 8,324                    | -0.48 [-0.68; -0.28] | 2.40E-06       | 0.24%          | 0.12                       | 8,324             | -0.48 [-0.68; -0.28] | 2.52E-06       | 0.26%                               | 0.14              | 8,309      | -0.40 [-0.60; -0.19] | 1.86E-04                           | 0.15%             | 0.25     | 8,305      | -0.47 [-0.67; -0.27] | 4.86E-06          | 0.23%          | 0.22     |
| <b>Whole Milk</b>          | 8,329                    | 0.06 [-0.34; 0.45]   | 0.78           | <0.01%         | 0.26                       | 8,329             | 0.04 [-0.44; 0.36]   | 0.84           | <0.01%                              | 0.62              | 8,277      | 0.00 [-0.47; 0.32]   | 0.70                               | <0.01%            | 0.52     | 8,245      | 0.03 [-0.37; 0.42]   | 0.89              | <0.01%         | 0.28     |
| <b>Yoghurt</b>             | 8,310                    | -0.02 [-1.24; 1.21]  | 0.98           | <0.01%         | 0.02                       | 8,310             | 0.04 [-1.12; 1.19]   | 0.99           | <0.01%                              | 0.04              | 8,295      | 0.50 [-0.64; 1.64]   | 0.39                               | 0.02%             | 0.06     | 8,263      | 0.21 [-1.02; 1.44]   | 0.74              | <0.01%         | 0.02     |
| <b>Cake/Pie</b>            | 8,345                    | -0.50 [-1.12; 0.13]  | 0.12           | 0.03%          | 0.04                       | 8,345             | -0.50 [-0.84; -0.16] | 4.18E-03       | 0.06%                               | 0.21              | 8,330      | -0.48 [-0.82; -0.14] | 0.07                               | 0.05%             | 0.11     | 8,326      | -0.52 [-1.11; 0.06]  | 0.08              | 0.03%          | 0.06     |
| <b>*Candy</b>              | 6,231                    | -0.24 [-0.86; 0.38]  | 0.45           | 0.01%          | 0.68                       | 6,231             | -0.31 [-0.94; 0.31]  | 0.32           | 0.01%                               | 0.72              | 6,218      | -0.25 [-0.88; 0.37]  | 0.43                               | 0.01%             | 0.66     | 6,192      | -0.15 [-0.78; 0.47]  | 0.63              | <0.01%         | 0.67     |
| <b>Chocolate</b>           | 8,342                    | 0.02 [-0.90; 0.94]   | 0.97           | 0.02%          | 0.02                       | 8,342             | -0.10 [-1.03; 0.84]  | 0.84           | 0.04%                               | 0.02              | 8,323      | -0.06 [-0.92; 0.80]  | 0.89                               | 0.02%             | 0.04     | 8,294      | -0.04 [-0.92; 0.85]  | 0.94              | 0.03%          | 0.03     |
| <b>Muffins/Corn Bread</b>  | 8,345                    | -0.94 [-2.23; 0.35]  | 0.15           | 0.05%          | 0.02                       | 8,345             | -0.97 [-2.34; 0.41]  | 0.17           | 0.05%                               | 0.01              | 8,330      | -0.88 [-2.17; 0.42]  | 0.18                               | 0.04%             | 0.02     | 8,297      | -0.86 [-2.16; 0.44]  | 0.19              | 0.05%          | 0.02     |
| <b>Fish</b>                | 8,344                    | 0.48 [-0.54; 1.49]   | 0.36           | 0.02%          | 0.08                       | 8,344             | 0.87 [-0.16; 1.57]   | 0.07           | 0.06%                               | 0.33              | 8,329      | 0.82 [-0.14; 1.49]   | 0.02                               | 0.06%             | 0.21     | 8,296      | 0.70 [-0.00; 1.38]   | 0.04              | 0.04%          | 0.26     |
| <b>Shellfish</b>           | 8,330                    | 2.31 [-0.64; 3.98]   | 0.01           | 0.09%          | 0.39                       | 8,330             | 2.32 [-0.64; 3.99]   | 0.01           | 0.09%                               | 0.38              | 8,315      | 2.31 [-0.63; 3.98]   | 0.01                               | 0.10%             | 0.37     | 8,284      | 2.37 [-0.70; 4.04]   | 0.04              | 0.09%          | 0.31     |
| <b>Citrus Fruit</b>        | 8,344                    | -0.28 [-0.74; 0.18]  | 0.23           | 0.01%          | 0.27                       | 8,344             | -0.12 [-0.60; 0.35]  | 0.61           | <0.01%                              | 0.26              | 8,329      | 0.01 [-0.46; 0.49]   | 0.96                               | <0.01%            | 0.19     | 8,296      | -0.18 [-0.64; 0.28]  | 0.44              | 0.01%          | 0.46     |
| <b>Non-Citrus Fruit</b>    | 8,346                    | -0.14 [-0.33; 0.04]  | 0.43           | 0.01%          | 0.30                       | 8,346             | -0.05 [-0.26; 0.15]  | 0.61           | <0.01%                              | 0.69              | 8,331      | 0.07 [-0.14; 0.29]   | 0.91                               | <0.01%            | 0.33     | 8,298      | -0.07 [-0.37; 0.21]  | 0.78              | <0.01%         | 0.45     |
| <b>**Apple/Pear</b>        | 5,484                    | -0.20 [-0.71; 0.30]  | 0.43           | <0.01%         | 0.70                       | 5,484             | -0.10 [-0.52; 0.55]  | 0.96           | <0.01%                              | 0.63              | 5,470      | -0.15 [-0.53; 0.23]  | 0.49                               | 0.02%             | 0.48     | 5,444      | -0.04 [-0.56; 0.48]  | 0.88              | <0.01%         | 0.49     |
| <b>**Berry</b>             | 5,485                    | -0.46 [-1.11; 0.19]  | 0.17           | 0.03%          | 0.35                       | 5,485             | -0.32 [-0.98; 0.35]  | 0.35           | 0.01%                               | 0.76              | 5,471      | -0.06 [-0.64; 0.51]  | 0.86                               | <0.01%            | 0.81     | 5,446      | -0.32 [-0.98; 0.34]  | 0.34              | 0.02%          | 0.59     |
| <b>**Melon</b>             | 4,807                    | -0.24 [-0.97; 0.49]  | 0.57           | 0.01%          | 0.25                       | 4,807             | -0.40 [-1.08; 0.72]  | 0.92           | <0.01%                              | 0.42              | 4,803      | -0.16 [-0.72; 0.39]  | 0.83                               | <0.01%            | 0.30     | 4,759      | -0.20 [-0.94; 0.53]  | 0.59              | <0.01%         | 0.32     |
| <b>*Peach</b>              | 7,602                    | -0.12 [-0.82; 0.58]  | 0.75           | <0.01%         | 0.91                       | 7,602             | 0.15 [-0.57; 0.86]   | 0.69           | <0.01%                              | 0.95              | 7,587      | 0.36 [-0.04; 0.98]   | 0.47                               | 0.01%             | 0.90     | 7,554      | -0.03 [-0.73; 0.68]  | 0.94              | <0.01%         | 0.92     |
| <b>Brown Bread</b>         | 8,328                    | 0.45 [-0.71; -0.20]  | 5.18E-04       | 0.11%          | 0.12                       | 8,328             | -0.40 [-0.67; -0.13] | 3.72E-03       | 0.07%                               | 0.31              | 8,313      | -0.35 [-0.60; -0.05] | 0.02                               | 0.05%             | 0.15     | 8,309      | -0.34 [-0.61; -0.08] | 0.01              | 0.07%          | 0.13     |
| <b>White Bread</b>         | 8,341                    | 0.07 [-0.05; 0.41]   | 0.12           | 0.04%          | 0.52                       | 8,341             | 0.14 [-0.04; 0.38]   | 0.25           | 0.02%                               | 0.92              | 8,326      | 0.07 [-0.16; 0.31]   | 0.55                               | 0.01%             | 0.87     | 8,298      | -0.15 [-0.46; 0.16]  | 0.54              | 0.01%          | 0.40     |
| <b>Cold Cereal</b>         | 8,342                    | 0.07 [-0.10; -0.30]  | 0.43           | 0.04%          | 0.13                       | 8,342             | -0.08 [-1.25; 1.03]  | 0.42           | 0.08%                               | 0.08              | 8,327      | -0.32 [-0.92; -0.19] | 3.32E-03                           | 0.06%             | 0.20     | 8,294      | -0.38 [-0.96; -0.20] | 2.72E-03          | 0.07%          | 0.19     |
| <b>*Cooked Cereal</b>      | 7,601                    | -0.32 [-1.02; 0.38]  | 0.68           | <0.01%         | 0.98E-03                   | 7,601             | -0.16 [-1.07; 1.55]  | 0.86           | 0.01%                               | 2.44E-03          | 7,586      | 0.09 [-0.61; 0.79]   | 0.92                               | 0.00%             | 3.44E-03 | 7,582      | -0.17 [-1.77; 1.43]  | 0.83              | <0.01%         | 6.88E-03 |
| <b>Pasta</b>               | 8,329                    | -0.11 [-1.02; 0.79]  | 0.81           | <0.01%         | 0.91                       | 8,329             | -0.02 [-0.93; 0.89]  | 0.96           | <0.01%                              | 0.92              | 8,314      | -0.08 [-0.99; 0.83]  | 0.86                               | <0.01%            | 0.90     | 8,298      | -0.15 [-1.06; 0.76]  | 0.79              | <0.01%         | 0.90     |
| <b>*Rice</b>               | 7,603                    | 0.28 [-0.65; 1.21]   | 0.56           | 0.01%          | 0.97                       | 7,603             | 0.43 [-0.50; 1.57]   | 0.37           | 0.03%                               | 0.96              | 7,588      | 0.59 [-0.35; 1.54]   | 0.22                               | 0.04%             | 0.97     | 7,555      | 0.42 [-0.52; 1.36]   | 0.38              | 0.02%          | 0.98     |
| <b>Legumes</b>             | 8,329                    | 0.52 [-0.88; 1.91]   | 0.47           | 0.02%          | 0.08                       | 8,329             | 0.28 [-0.78; 2.14]   | 0.36           | 0.04%                               | 0.07              | 8,315      | 0.95 [-0.50; 2.40]   | 0.20                               | 0.06%             | 0.07     | 8,311      | 0.73 [-0.25; 1.68]   | 0.15              | 0.03%          | 0.12     |
| <b>*Nuts</b>               | 5,123                    | -0.26 [-0.75; 0.23]  | 0.30           | 0.04%          | 0.41                       | 5,123             | -0.29 [-0.79; 0.21]  | 0.25           | 0.03%                               | 0.70              | 5,112      | -0.15 [-0.66; 0.35]  | 0.56                               | 0.02%             | 0.58     | 5,106      | -0.19 [-0.69; 0.30]  | 0.45              | 0.03%          | 0.61     |
| <b>*Peanuts</b>            | 6,227                    | -0.65 [-1.23; -0.07] | 0.03           | 0.07%          | 0.44                       | 6,227             | -0.55 [-1.13; 0.04]  | 0.07           | 0.05%                               | 0.53              | 6,216      | -0.61 [-1.21; -0.02] | 0.04                               | 0.06%             | 0.81     | 6,187      | -0.55 [-1.13; 0.03]  | 0.06              | 0.06%          | 0.45     |
| <b>*Bacon</b>              | 6,224                    | 0.84 [-0.40; 2.08]   | 0.18           | 0.02%          | 0.41                       | 6,224             | 0.65 [-0.60; 1.89]   | 0.31           | 0.01%                               | 0.24              | 6,210      | 0.22 [-1.06; 1.50]   | 0.74                               | <0.01%            | 0.17     | 6,215      | 0.75 [-0.51; 2.01]   | 0.24              | 0.02%          | 0.25     |
| <b>Beef/Pork/Lamb</b>      | 8,345                    | 0.47 [-0.02; 0.92]   | 0.04           | 0.04%          | 0.80                       | 8,345             | 0.43 [-0.05; 0.89]   | 0.07           | 0.02%                               | 0.85              | 8,330      | 0.23 [-0.25; 0.72]   | 0.35                               | 0.01%             | 0.83     | 8,326      | 0.44 [-0.03; 0.92]   | 0.07              | 0.03%          | 0.90     |
| <b>**Hamburger</b>         | 5,438                    | 1.45 [-0.22; 3.13]   | 0.09           | 0.02%          | 0.34                       | 5,438             | 1.17 [-0.52; 2.85]   | 0.17           | 0.01%                               | 0.29              | 5,424      | 1.32 [-0.38; 3.02]   | 0.13                               | 0.01%             | 0.38     | 5,400      | 1.28 [-0.40; 2.96]   | 0.14              | 0.02%          | 0.28     |
| <b>**Hotdog</b>            | 5,493                    | 0.80 [-1.72; 3.32]   | 0.54           | 0.01%          | 0.30                       | 5,493             | 0.61 [-1.92; 3.13]   | 0.64           | <0.01%                              | 0.50              | 5,479      | 0.17 [-1.65; 1.24]   | 0.78                               | <0.01%            | 0.22     | 5,446      | -0.35 [-1.79; 1.10]  | 0.64              | <0.01%         | 0.26     |
| <b>Organ Meats</b>         | 8,337                    | 0.23 [-1.49; 4.81]   | 0.92           | <0.01%         | 0.23                       | 8,337             | 0.12 [-1.49; 4.73]   | 0.96           | <0.01%                              | 0.23              | 8,322      | -0.24 [-1.76; 2.39]  | 0.89                               | <0.01%            | 0.35     | 5,455      | 0.75 [-1.79; 3.28]   | 0.56              | 0.01%          | 0.48     |
| <b>*Sausage/Lunch Meat</b> | 6,233                    | 0.26 [-0.53; 1.05]   | 0.52           | 0.01%          | 0.65                       | 6,233             | 0.15 [-0.64; 0.94]   | 0.72           | <0.01%                              | 0.83              | 6,219      | -0.13 [-0.84; 0.69]  | 0.76                               | <0.01%            | 0.16     | 8,293      | 0.05 [-0.57; 4.68]   | 0.98              | <0.01%         | 0.21     |
| <b>Poultry</b>             | 8,                       |                      |                |                |                            |                   |                      |                |                                     |                   |            |                      |                                    |                   |          |            |                      |                   |                |          |



**Table S9. Interaction between the four diet quality scores and the genetic risk score.**

| Diet Score       | Full Cohort |                     |           |                |          | Male-Only |                     |           |                |          | Female-Only |                     |           |                |          |
|------------------|-------------|---------------------|-----------|----------------|----------|-----------|---------------------|-----------|----------------|----------|-------------|---------------------|-----------|----------------|----------|
|                  | n           | $\beta$ [95% CI]    | $P_\beta$ | R <sup>2</sup> | $P_\phi$ | n         | $\beta$ [95% CI]    | $P_\beta$ | R <sup>2</sup> | $P_\phi$ | n           | $\beta$ [95% CI]    | $P_\beta$ | R <sup>2</sup> | $P_\phi$ |
| "Healthy-Eating" | 12,162      | 0.00 [-0.01; 0.02]  | 0.75      | 0.12%          | 0.51     | 6,109     | 0.01 [-0.01; 0.04]  | 0.37      | 0.17%          | 0.47     | 6,053       | -0.01 [-0.03; 0.01] | 0.21      | 0.07%          | 0.34     |
| DASH             | 12,147      | -0.01 [-0.02; 0.01] | 0.32      | 0.39%          | 0.46     | 6,106     | 0.00 [-0.02; 0.02]  | 0.90      | 0.45%          | 0.42     | 6,041       | -0.02 [-0.03; 0.00] | 0.04      | 0.31%          | 0.34     |
| Mediterranean    | 12,131      | 0.00 [-0.01; 0.01]  | 0.99      | 0.12%          | 0.13     | 6,092     | 0.01 [-0.01; 0.03]  | 0.38      | 0.23%          | 0.63     | 6,039       | -0.01 [-0.02; 0.01] | 0.28      | 0.02%          | 0.10     |
| Data-Derived     | 12,078      | 0.00 [-0.01; 0.01]  | 0.46      | 0.09%          | 0.32     | 6,063     | -0.01 [-0.02; 0.01] | 0.31      | 0.08%          | 0.16     | 6,015       | 0.00 [-0.02; 0.01]  | 0.86      | 0.12%          | 0.67     |

## SUPPLEMENTAL FIGURES

### Figure S1. Exclusion criteria for each data-set.

Demographic and medical exclusion criteria are in normal font, dietary data exclusion criteria are in italics. The cohort sizes before and after exclusion are shown in bold font. Study-specific criteria were exclusion of related family members in the ARIC and NHANES III cohorts and exclusion of CHS individuals who were also part of the ARIC, Systolic Hypertension in the Elderly (SHEP), or NHANES III studies. CHS interviewers did not assess the reliability of participant's food frequency questionnaire answers nor acquire data on gout status.

### Figure S2. Distribution of the Healthy Eating diet score in the ARIC (A), CARDIA (B), CHS (C), FHS (D), and NHANES III (E) cohorts.

Solid blue line – smoothed density curve of the Healthy Eating diet score distribution. Dashed red line – smoothed density curve for a random approximation of the normal distribution for data of the same length, mean, and standard deviation.

### Figure S3. Distribution of the DASH diet score in the ARIC (A), CARDIA (B), CHS (C), FHS (D), and NHANES III (E) cohorts.

Solid blue line – smoothed density curve of the DASH diet score distribution. Dashed red line – smoothed density curve for a random approximation of the normal distribution for data of the same length, mean, and standard deviation.

### Figure S4. Distribution of the Mediterranean diet score in the ARIC (A), CARDIA (B), CHS (C), FHS (D), and NHANES III (E) cohorts.

Solid blue line – smoothed density curve of the Mediterranean diet score distribution. Dashed red line – smoothed density curve for a random approximation of the normal distribution for data of the same length, mean, and standard deviation.

### Figure S5. Parallel factor analysis scree plot of eigenvalues.

Solid blue line / triangles – eigenvalues from the actual dietary data. Dotted red line – eigenvalues from simulated data had the same mean and variance as the original data, but with no correlations among the observed variables. Dashed red line – eigenvalues from resampled data generated from the original sample. The point where the eigenvalues for the simulated or resampled data crosses the eigenvalues from the actual data is the point of inflection, indicating the number of factor analysis vectors to retain for further analysis.

### Figure S6. Distribution of the data-driven diet score in the ARIC (A), CARDIA (B), CHS (C), FHS (D), and NHANES III (E) cohorts.

Solid blue line – smoothed density curve of the data-driven diet score distribution. Dashed red line – smoothed density curve for a random approximation of the normal distribution for data of the same length, mean, and standard deviation.

### Figure S7. Correlogram of consumption of 63 food items (serves per week).

Correlations were calculated using a Pearson's product-moment correlation test in the full cohort. Blue indicates a positive correlation, orange a negative correlation. X – non-significant correlation p-value ( $P_{\text{Cor}} \geq 2.6 \times 10^{-5}$ ; Bonferroni multiple-testing correction of 0.05 divided by 1,953 correlations), no mark indicates a significant correlation ( $P_{\text{Cor}} < 2.6 \times 10^{-5}$ ).

### Figure S8. Distribution of the genetic risk score in the ARIC (A), CARDIA (B), CHS (C) and FHS (D) cohorts.

Solid blue line – smoothed density curve of the data-driven diet score distribution. Dashed red line – smoothed density curve for a random approximation of the normal distribution for data of the same length, mean, and standard deviation.

**Figure S1. Exclusion criteria for each data set.**

|                                                         | ARIC         | CARDIA       | CHS          | FHS          | NHANES III   |
|---------------------------------------------------------|--------------|--------------|--------------|--------------|--------------|
|                                                         | 15,485       | 3,622        | 5,582        | 4,148        | 33,994       |
| <18 Years Old                                           | N/A          | 6            | N/A          | 0            | 13,559       |
| No Serum Urate Measurement                              | 162          | 40           | 131          | 131          | 3,939        |
| Non-European Ancestry                                   | 3,995        | 1,647        | 878          | 23           | 9,620        |
| Not Whole-Genome Genotyped                              | 1,707        | 262          | 1,308        | 205          | N/A          |
| Participant Has Gout                                    | 427          | 22           | N/A          | 31           | 293          |
| Participant Has Kidney Disease                          | 137          | 63           | 141          | 162          | 174          |
| Currently Taking Urate Lowering Therapies               | 11           | 0            | 68           | 0            | 18           |
| Currently Taking Diuretics                              | 1,229        | 9            | 625          | 109          | 669          |
| Missing Any Covariate Data                              | 970          | 78           | 147          | 63           | 330          |
| Other Exclusion Criteria (Study Specific)               | 350          | N/A          | 7            | N/A          | 608          |
| <i>Answered &lt;10% of Diet Questionnaire</i>           | 5            | 1            | 14           | 325          | 2            |
| <i>Average Calorie Intake ≤ 600 or ≥ 4,200 kcal/day</i> | 135          | 134          | 309          | 82           | 546          |
| <i>Answers Deemed Unreliable by Study</i>               | 99           | 25           | N/A          | 40           | 0            |
|                                                         | <b>6,258</b> | <b>1,335</b> | <b>1,954</b> | <b>2,977</b> | <b>4,236</b> |

**Figure S2. Distribution of the Healthy Eating score in the ARIC (A), CARDIA (B), CHS (C), FHS (D), and NHANES III (E) cohorts.**

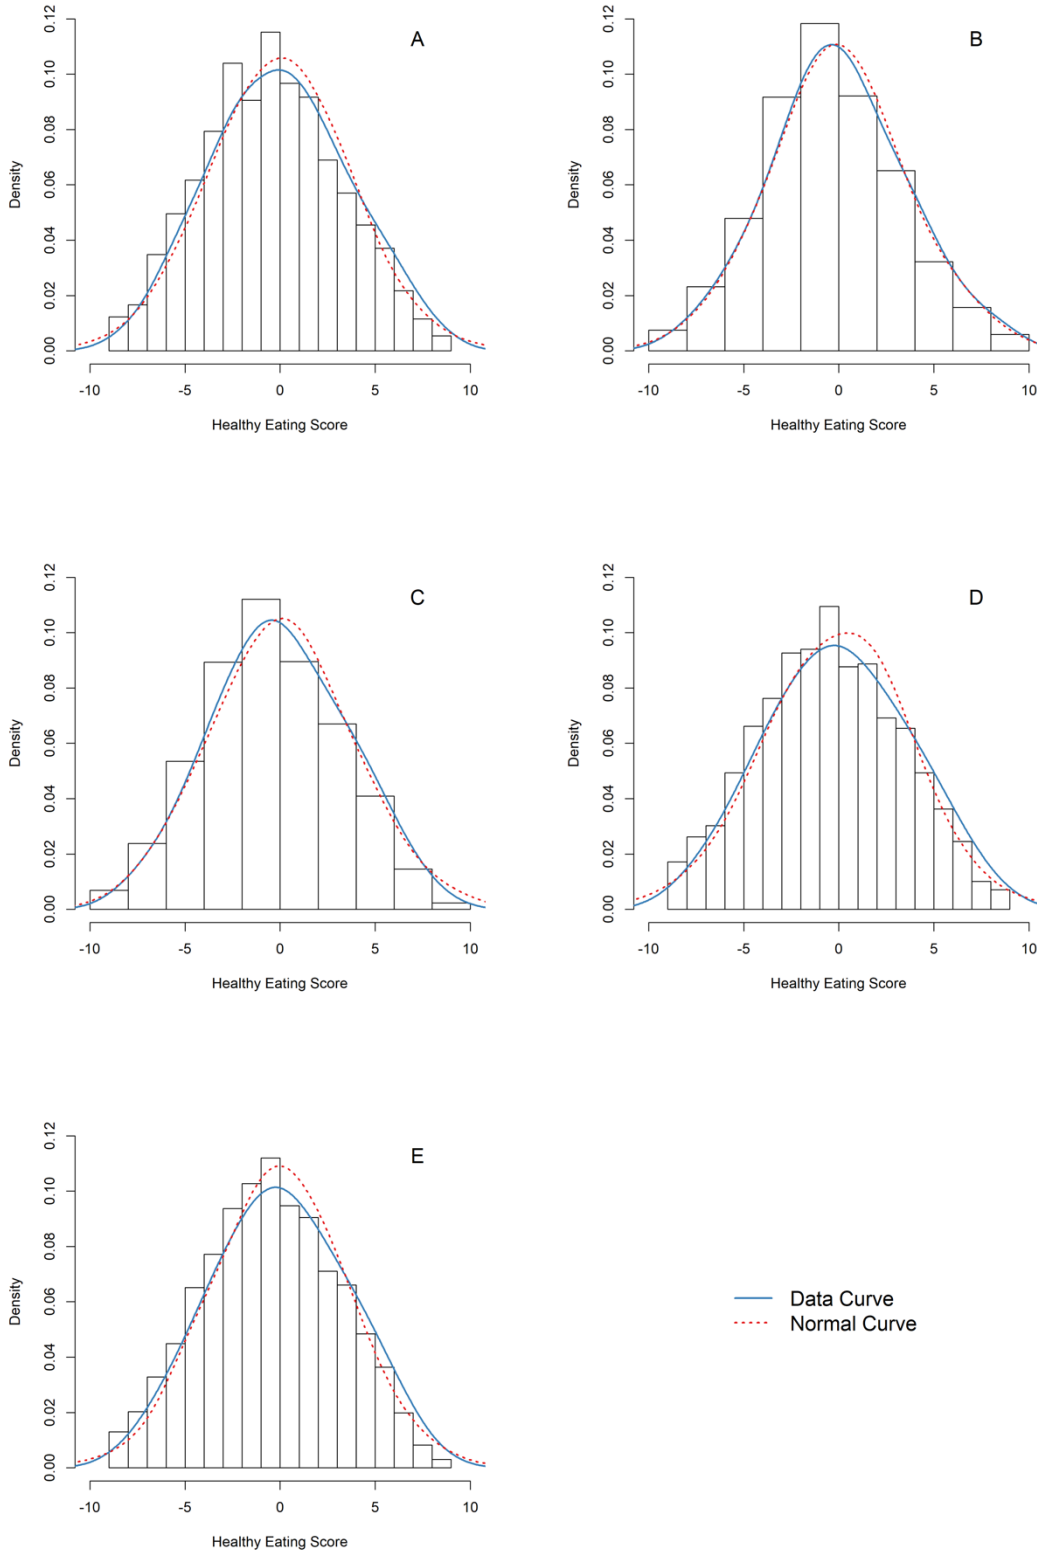

**Figure S3. Distribution of the DASH diet score in the ARIC (A), CARDIA (B), CHS (C), FHS (D), and NHANES III (E) cohorts.**

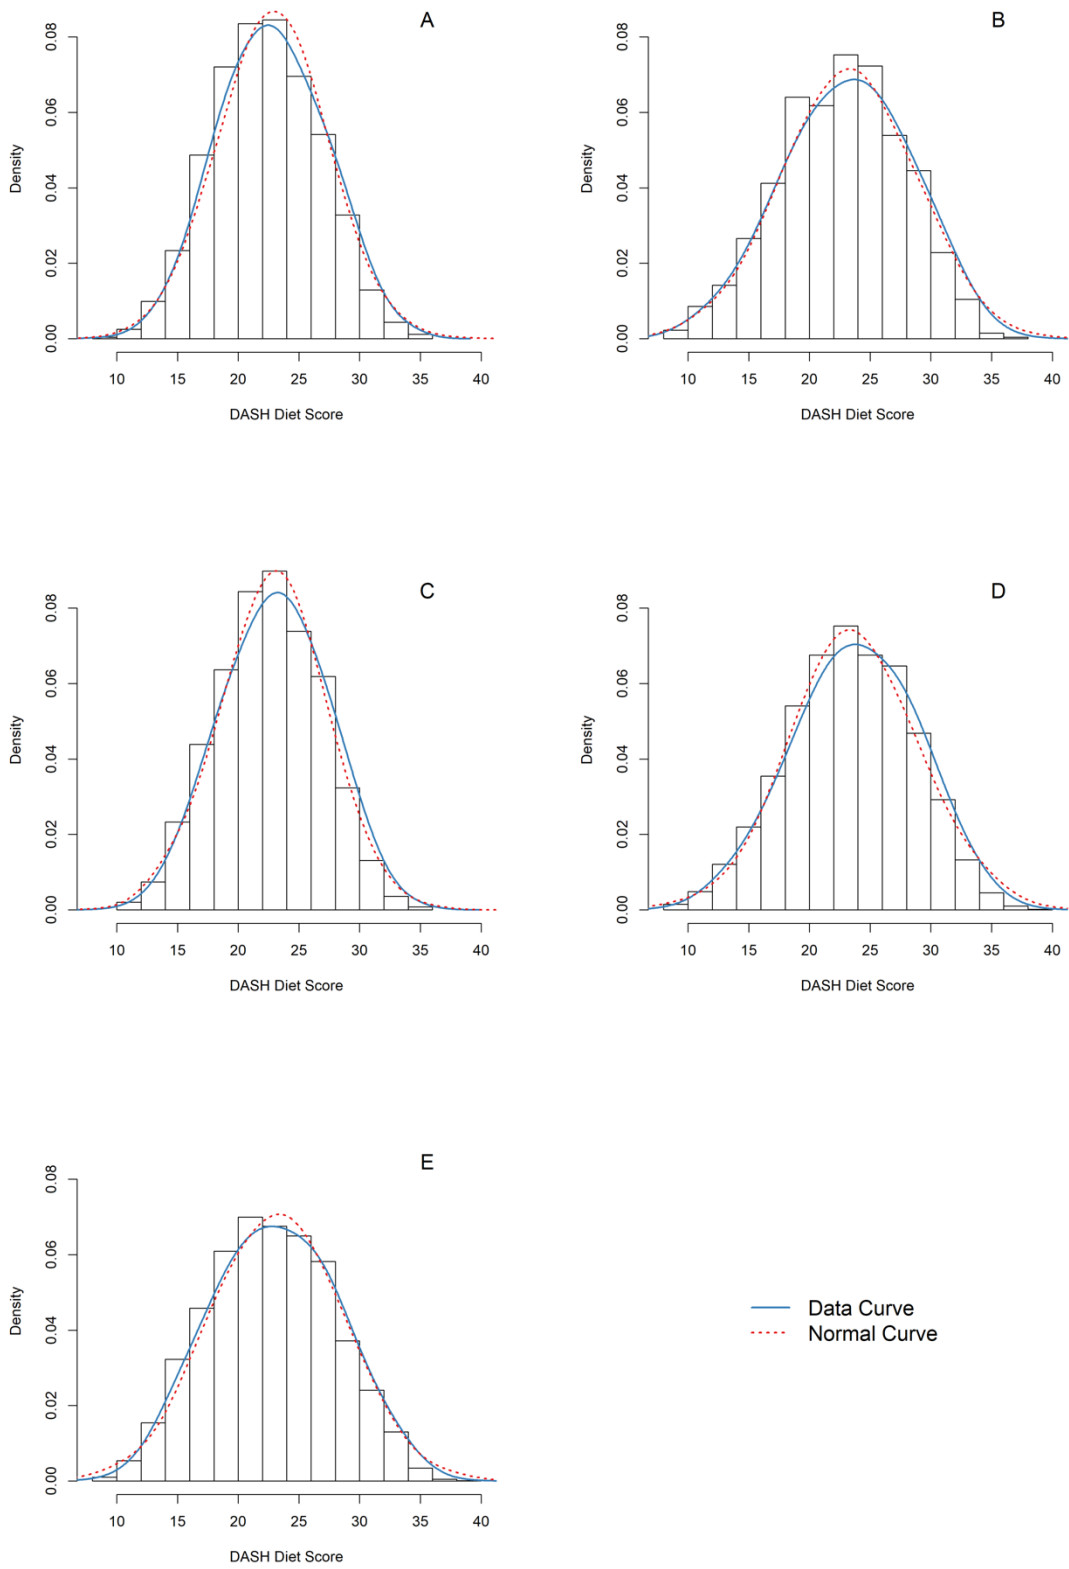

**Figure S4. Distribution of the Mediterranean diet score in the ARIC (A), CARDIA (B), CHS (C), FHS (D), and NHANES III (E) cohorts.**

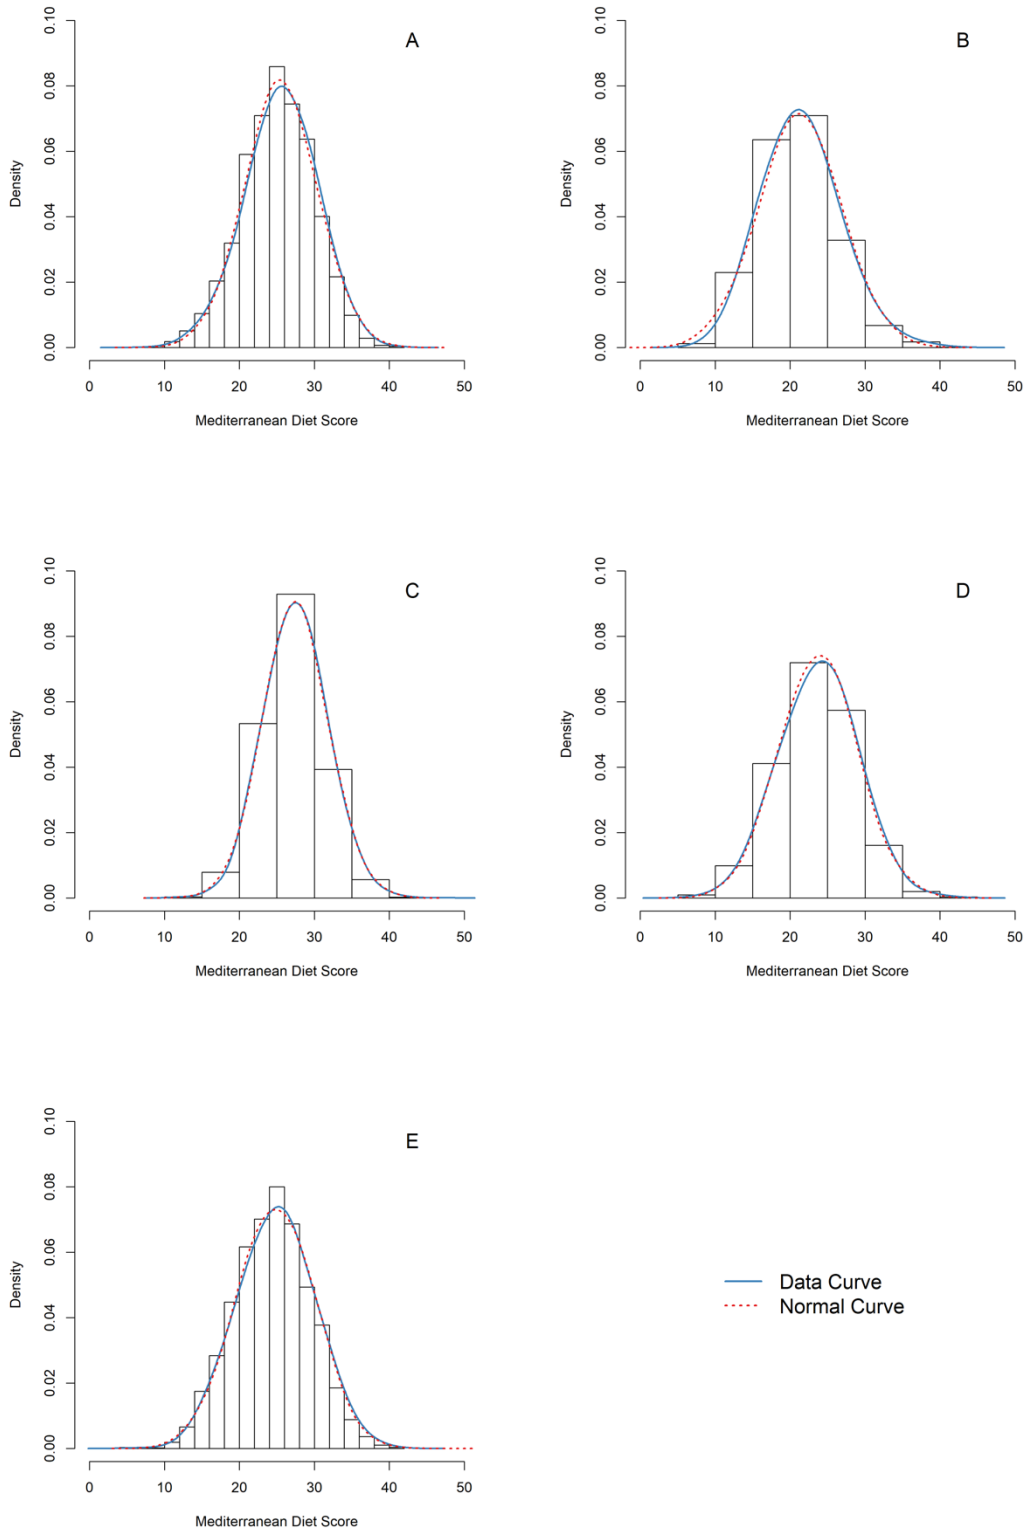



Figure S5. Parallel factor analysis scree plot of eigenvalues.

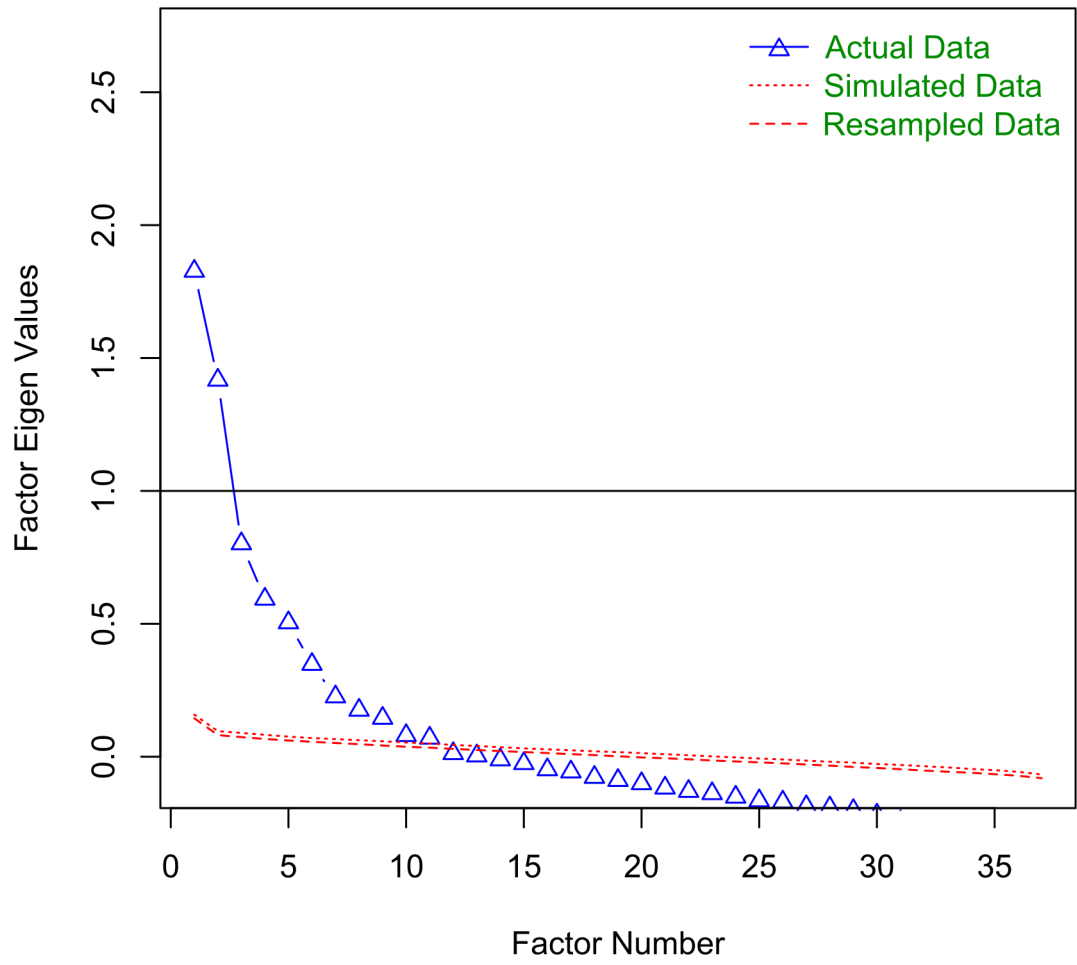

**Figure S6. Distribution of the data-driven diet score in the ARIC (A), CARDIA (B), CHS (C), FHS (D), and NHANES III (E) cohorts.**

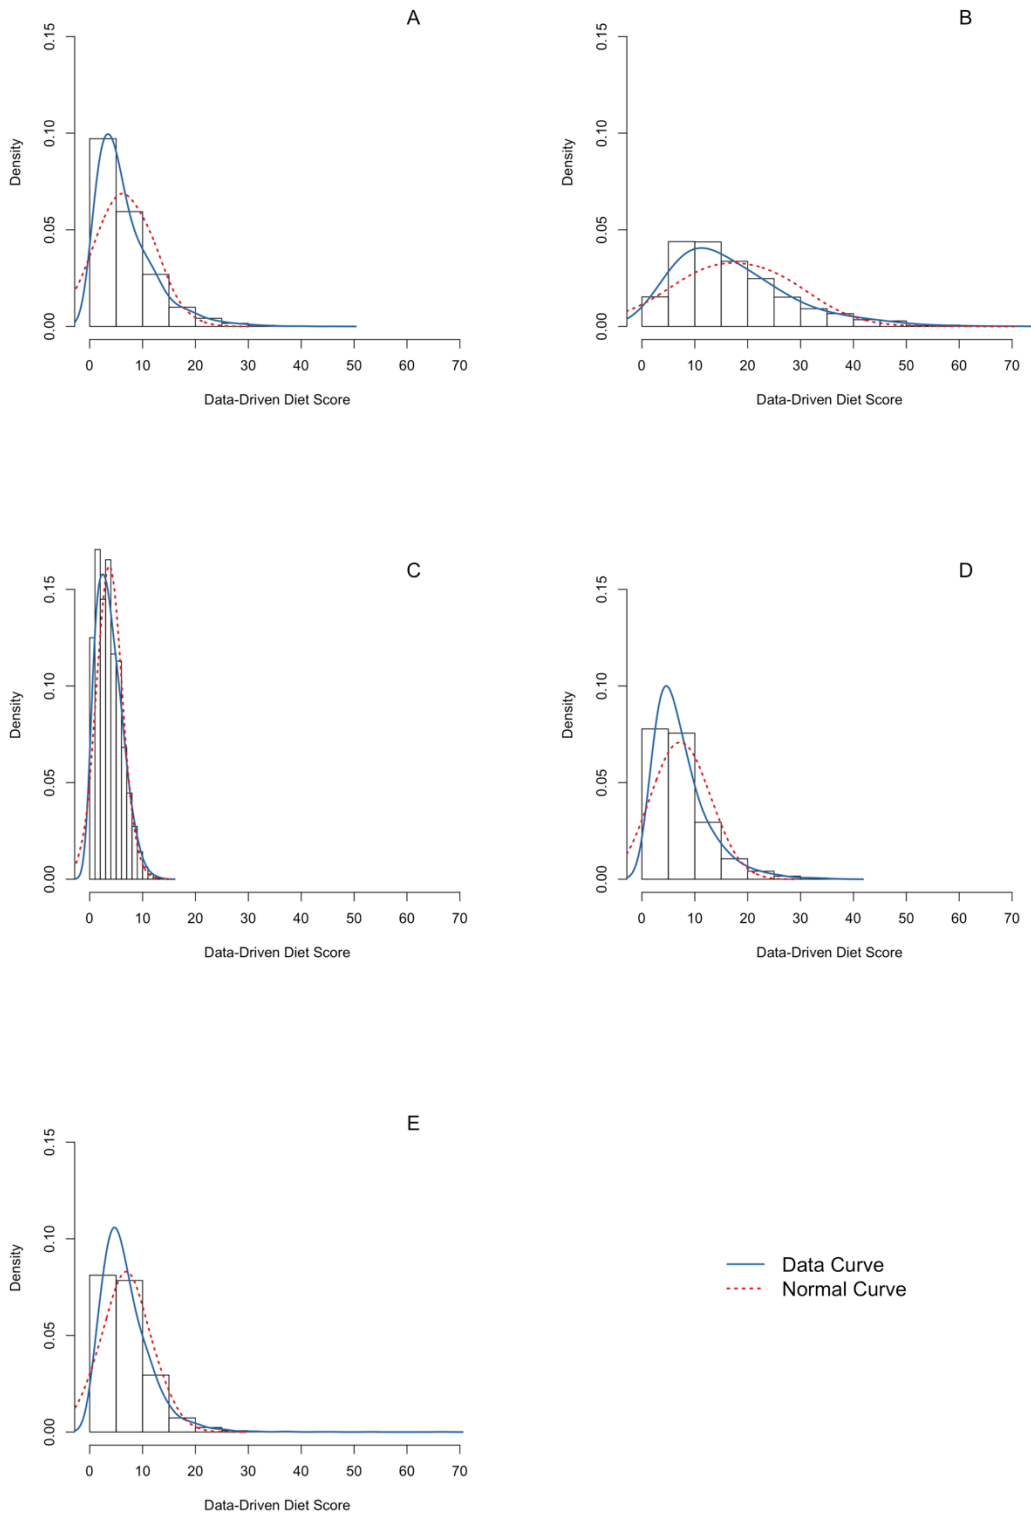

**Figure S7. Correlogram of consumption of 63 food items (serves/week).**

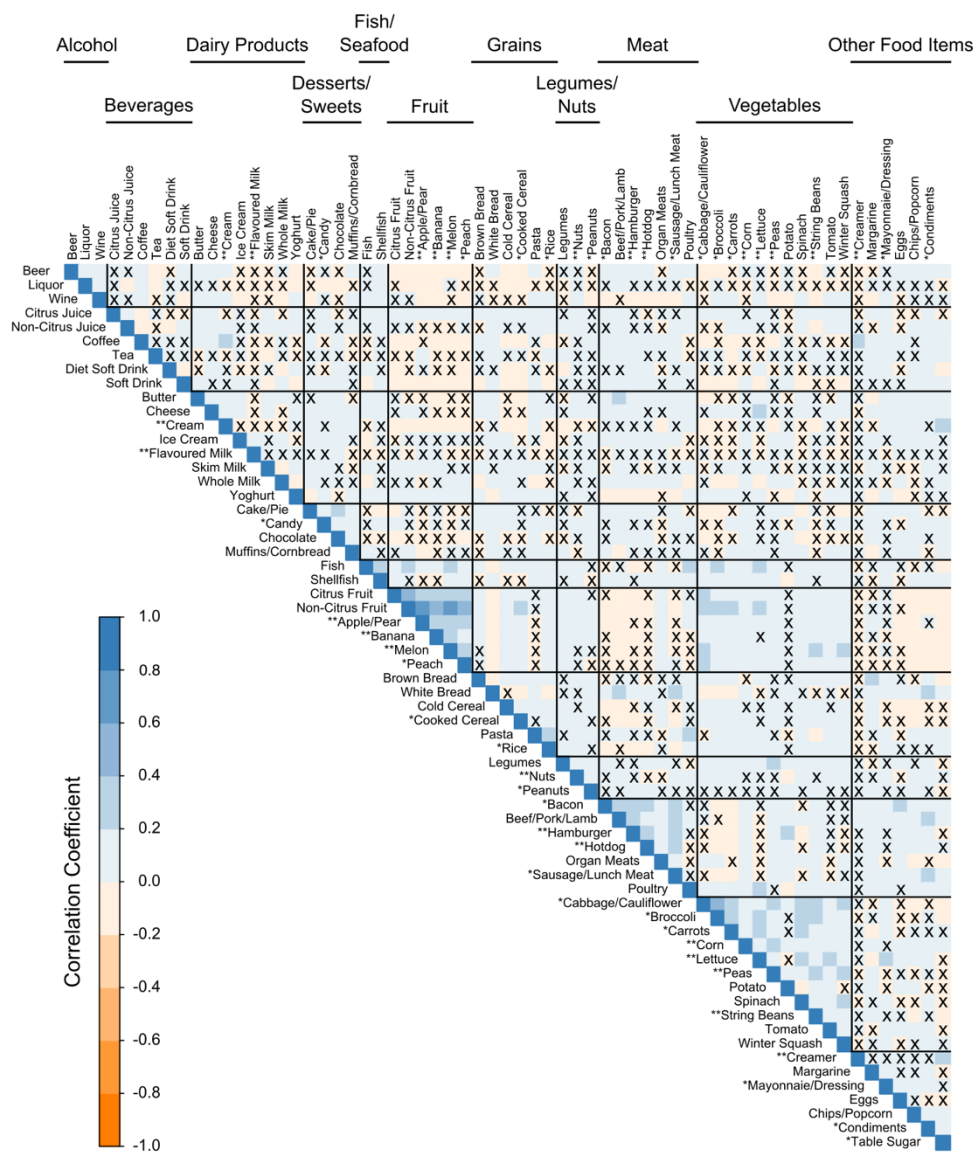

**Figure S8. Distribution of the genetic risk score in the ARIC (A), CARDIA (B), CHS (C) and FHS (D) cohorts.**

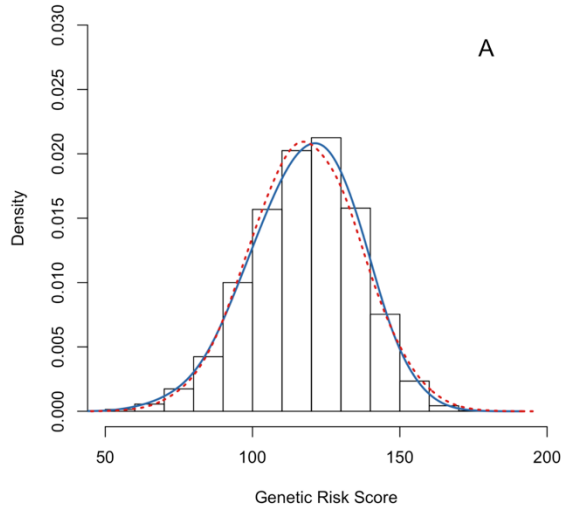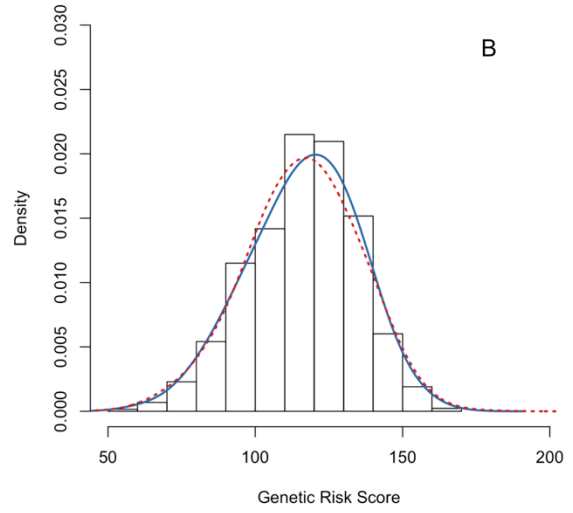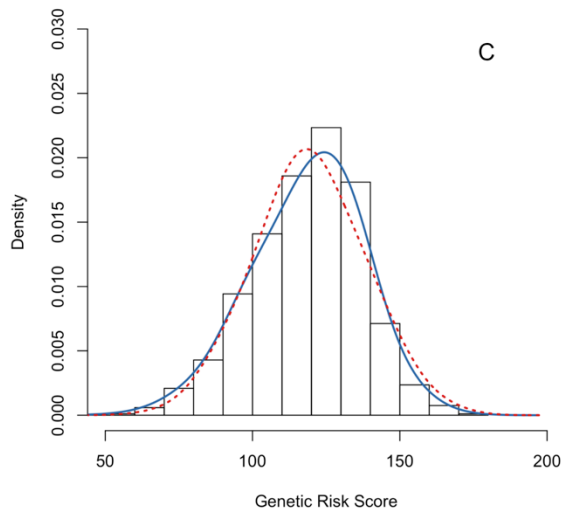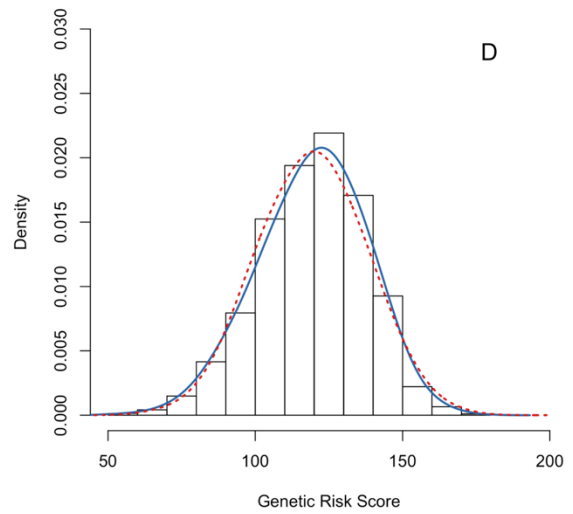

— Data Curve  
- - - Normal Curve

## References

1. Aho KA. Foundational and applied statistics for biologists using R. CRC Press, 2013.
2. Patterson N, Price AL, Reich D. Population structure and eigenanalysis. *PLoS Genet* 2006;2:e190.
3. Schwarzer G. Meta: An R package for meta-analysis. *R news* 2007;7:40-45.
4. Nettleton JA, Hivert M-F, Lemaitre RN, McKeown NM, Mozaffarian D, Tanaka T, et al. Meta-analysis investigating associations between healthy diet and fasting glucose and insulin levels and modification by loci associated with glucose homeostasis in data from 15 cohorts. *Am J Epidemiol* 2013;177:103-15.
5. Department of Nutrition Harvard. The Nutrition Source: Harvard T.H. Chan School of Public Health. Secondary The Nutrition Source: Harvard T.H. Chan School of Public Health 2015. <http://www.hsph.harvard.edu/nutritionsource/healthy-eating-plate/>.
6. Appel LJ, Moore TJ, Obarzanek E, Aicher KM, Conlin PR, Kennedy BM, et al. A clinical trial of the effects of dietary patterns on blood pressure. *New Eng J Med* 1997;336:1117-24.
7. Fung TT, Chiuve SE, McCullough ML, Rexrode ML, Logroscino G, Hu FB. Adherence to a DASH-style diet and risk of coronary heart disease and stroke in women. *Arch Intern Med* 2008;168:713-20.
8. Kumanyika S, Tell GS, Fried L, Martel JK, Chinchilli VM. Picture-sort method for administering a food frequency questionnaire to older adults. *J Am Diet Assoc* 1996;96:137-44.
9. Rimm EB, Giovannucci EL, Stampfer MJ, Colditz GA, Litin LB, Willett WC. Reproducibility and validity of an expanded self-administered semiquantitative food frequency questionnaire among male health professionals. *Am J Epidemiol* 1992;135:1114-26.
10. Stevens J, Metcalf PA, Dennis BH, Tell GS, Shimakawa T, Folsom MD. Reliability of a food frequency questionnaire by ethnicity, gender, age and education. *Nutr Res* 1996;16:735-45.
11. McDonald A, Van Horn L, Slattery M, Hilner J, Bragg C, Caan B, et al. The CARDIA dietary history: development, implementation, and evaluation. *J Am Diet Assoc* 1991;91:1104-12.
12. National Center for Health Statistics. Plan and operation of the Third National Health and Nutritional Examination Survey, 1988-94. Series 1: programs and collection procedures. *Vital Health Stat* 1994;1:1-407
13. Panagiotakos DB, Pitsavos C, Stefanadis C. Dietary patterns: A Mediterranean diet score and its relation to clinical and biological markers of cardiovascular disease risk. *Nutr Metab Cardiovasc Dis* 2006;12:559-68.
14. Panaretos D, Tzavelas G, Vamvakari M, Panagiotakos D. Factor analysis as a tool for pattern recognition in biomedical research; a review with application in R software. *J Data Sci* 2017;16:615-30.
15. Hu FB, Rimm E, Smith-Warner SA, Feskanich D, Stampfer MJ, Ascherio A, et al. Reproducibility and validity of dietary patterns assessed with a food-frequency questionnaire. *Am J Clin Nutr* 1999;69:243-9.
16. Tsai Y-T, Liu J-P, Tu Y-K, Lee MS, Chen PR, Hsu HC, et al. Relationship between dietary patterns and serum uric acid concentrations among ethnic Chinese adults in Taiwan. *Asia Pac J Clin Nutr* 2012;21:263-70.
17. Heidemann C, Scheidt-Nave C, Richter A, Mensink G. Dietary patterns are associated with cardiometabolic risk factors in a representative study population of German adults. *Br J Nutr* 2011;106:1253-62.

18. Köttgen A, Albrecht E, Teumer A, Vitart V, Hundertmark C, Pistis G, et al. Genome-wide association analyses identify 18 new loci associated with serum urate concentrations. *Nat Genet* 2013;45:145-54.
19. Howie BN, Donnelly P, Marchini J. A flexible and accurate genotype imputation method for the next generation of genome-wide association studies. *PLoS Genet* 2009;5:e1000529.
20. Chang CC, Chow CC, Tellier LC, Vattikuti S, Purcell SM, Lee JJ. Second-generation PLINK: rising to the challenge of larger and richer datasets. *Gigascience* 2015;4:7.
21. Yang J, Lee SH, Goddard ME, Visscher PM. GCTA: a tool for genome-wide complex trait analysis. *Am J Hum Genet* 2011;88:76-82.
